# Supplementary material for: Novel Xanomeline-Containing Bitopic Ligands of Muscarinic Acetylcholine Receptors: Design, Synthesis and FRET Investigation
Source: MDPI journal article supplement (doi:10.3390/molecules28052407), 2023-03-06

# Supporting Information

## Novel Xanomeline-Containing Bitopic Ligands of Muscarinic Acetylcholine Receptors: Design, Synthesis and FRET Investigation

Carlo Matera <sup>1</sup>, Michael Kauk <sup>2</sup>, Davide Cirillo <sup>1</sup>, Marco Maspero <sup>1</sup>, Claudio Papotto <sup>1</sup>, Daniela Volpato <sup>3</sup>, Ulrike Holzgrabe <sup>3</sup>, Marco De Amici <sup>1</sup>, Carsten Hoffmann <sup>2</sup> and Clelia Dallanocce <sup>1,\*</sup>

<sup>1</sup> Department of Pharmaceutical Sciences, Medicinal Chemistry Section "Pietro Pratesi", University of Milan, Via L. Mangiagalli 25, 20133 Milan, Italy

<sup>2</sup> Institute for Molecular Cell Biology, Center for Molecular Biomedicine, University Hospital Jena, Friedrich Schiller University Jena, Hans Knoell Str. 2, 07745 Jena, Germany

<sup>3</sup> Pharmaceutical and Medicinal Chemistry, Institute of Pharmacy and Food Chemistry, University of Würzburg, Am Hubland, 97074 Würzburg, Germany

\* Correspondence: clelia.dallanocce@unimi.it; Tel.: +39-02-503-19327

# Table of contents

|                               |                                                                        |         |
|-------------------------------|------------------------------------------------------------------------|---------|
| <b>Compound 15</b>            | <sup>1</sup> H NMR, <sup>13</sup> C NMR .....                          | S3      |
| <b>Compound 16</b>            | <sup>1</sup> H NMR, <sup>13</sup> C NMR .....                          | S4      |
| <b>Compound 17</b>            | <sup>1</sup> H NMR, <sup>13</sup> C NMR .....                          | S5      |
| <b>Compound 18</b>            | <sup>1</sup> H NMR, <sup>13</sup> C NMR .....                          | S6      |
| <b>Compound 19</b>            | <sup>1</sup> H NMR, <sup>13</sup> C NMR .....                          | S7      |
| <b>Compound 10</b>            | <sup>1</sup> H NMR, <sup>13</sup> C NMR .....                          | S8      |
| <b>Compound 22-C3</b>         | <sup>1</sup> H NMR, <sup>13</sup> C NMR .....                          | S9      |
| <b>Compound 22-C5</b>         | <sup>1</sup> H NMR, <sup>13</sup> C NMR .....                          | S10     |
| <b>Compound 22-C7</b>         | <sup>1</sup> H NMR, <sup>13</sup> C NMR .....                          | S11     |
| <b>Compound 22-C9</b>         | <sup>1</sup> H NMR, <sup>13</sup> C NMR .....                          | S12     |
| <b>Compound 23-C3</b>         | <sup>1</sup> H NMR, <sup>13</sup> C NMR .....                          | S13     |
| <b>Compound 23-C5</b>         | <sup>1</sup> H NMR, <sup>13</sup> C NMR .....                          | S14     |
| <b>Compound 23-C7</b>         | <sup>1</sup> H NMR, <sup>13</sup> C NMR .....                          | S15     |
| <b>Compound 23-C9</b>         | <sup>1</sup> H NMR, <sup>13</sup> C NMR .....                          | S16     |
| <b>Compound 13-C3</b>         | <sup>1</sup> H NMR, <sup>13</sup> C NMR, HRMS .....                    | S17-S18 |
| <b>Compound 13-C5</b>         | <sup>1</sup> H NMR, <sup>13</sup> C NMR, HRMS .....                    | S19-S20 |
| <b>Compound 13-C7</b>         | <sup>1</sup> H NMR, <sup>13</sup> C NMR, HRMS .....                    | S21-S22 |
| <b>Compound 13-C9</b>         | <sup>1</sup> H NMR, <sup>13</sup> C NMR, HRMS .....                    | S23-S24 |
| <b>Compound 12-C3</b>         | <sup>1</sup> H NMR, <sup>13</sup> C NMR .....                          | S25     |
| <b>Compound 12-C3 Oxalate</b> | <sup>1</sup> H NMR, <sup>13</sup> C NMR, Elemental analysis, HRMS..... | S26-S28 |
| <b>Compound 12-C5</b>         | <sup>1</sup> H NMR, <sup>13</sup> C NMR, HRMS .....                    | S29-S30 |
| <b>Compound 12-C7</b>         | <sup>1</sup> H NMR, <sup>13</sup> C NMR, HRMS .....                    | S31-S32 |
| <b>Compound 12-C9</b>         | <sup>1</sup> H NMR, <sup>13</sup> C NMR, HRMS .....                    | S33-S34 |

## Compound 15

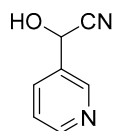

$^1\text{H}$  NMR spectrum

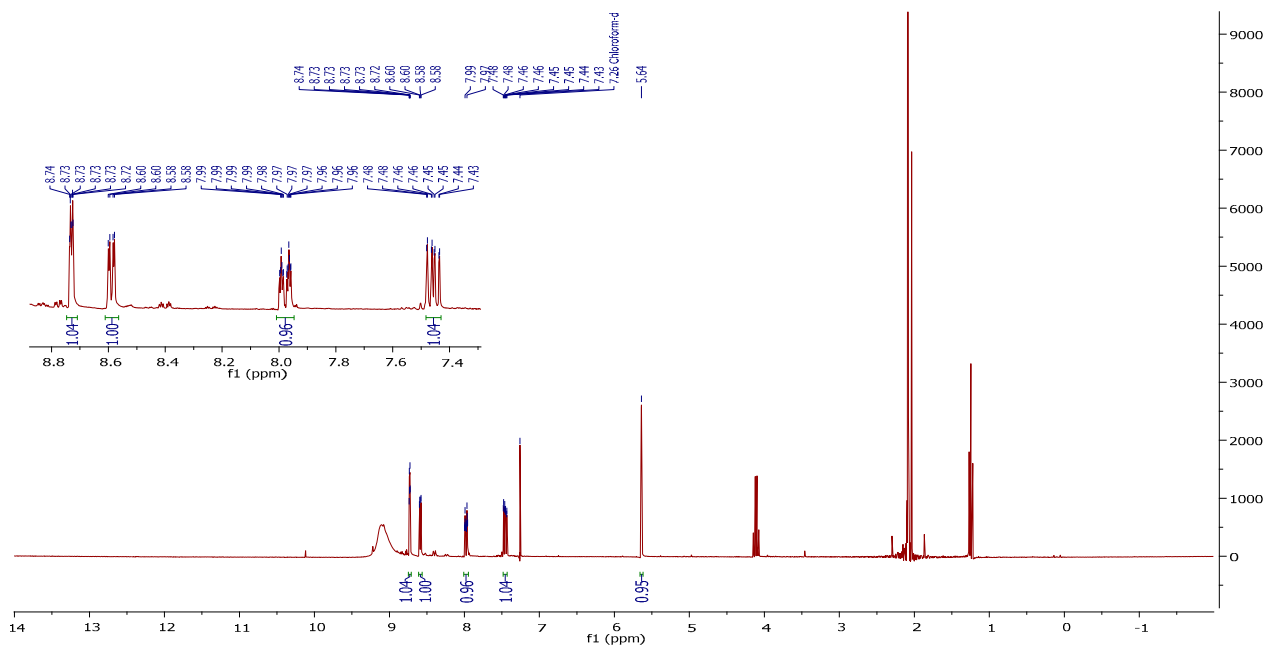

$^{13}\text{C}$  NMR spectrum

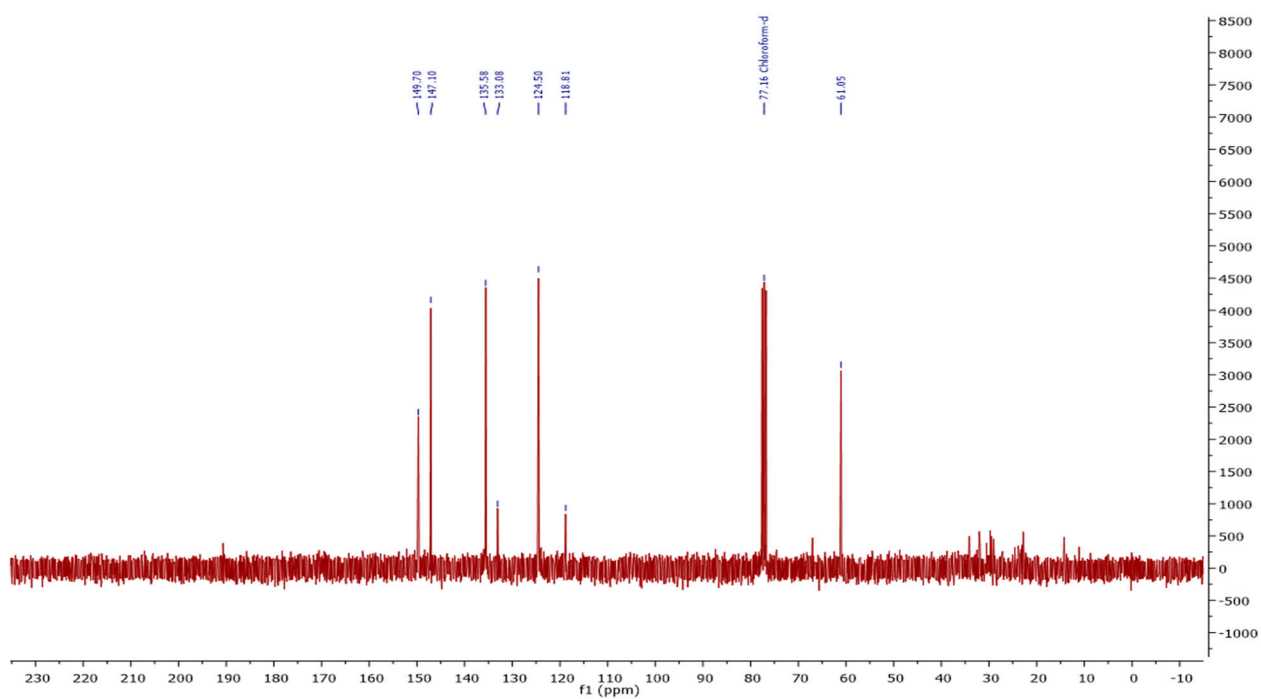

# Compound 16

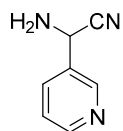

$^1\text{H}$  NMR spectrum

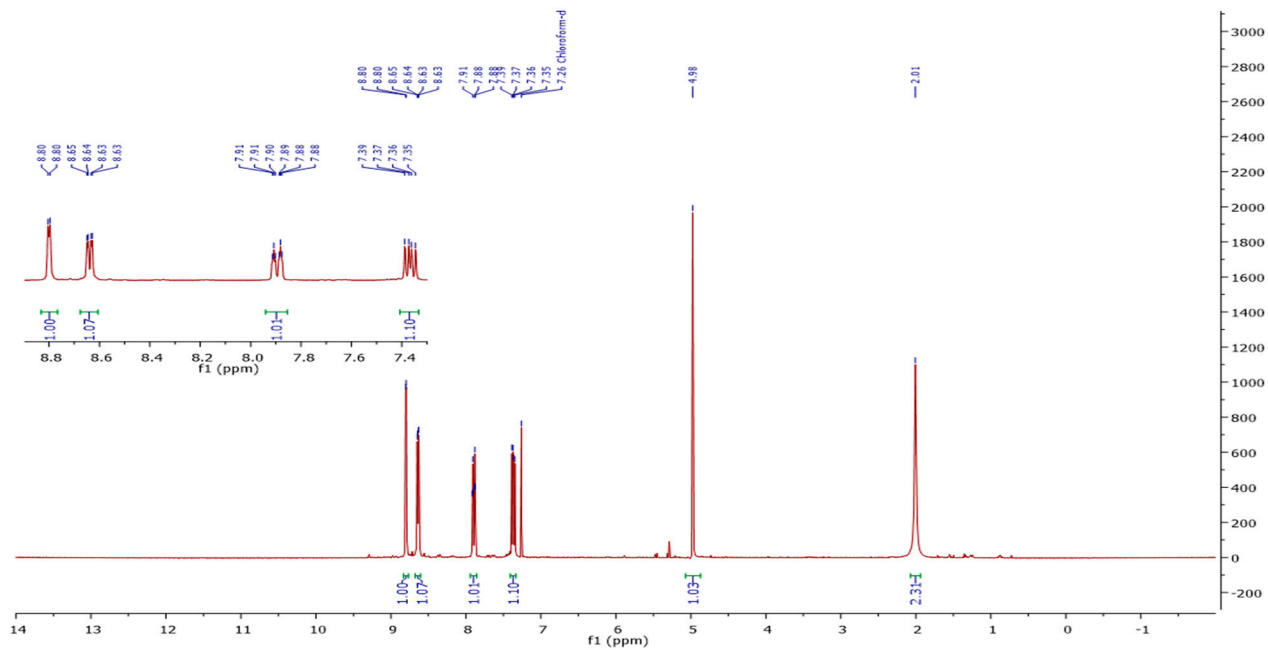

$^{13}\text{C}$  NMR spectrum

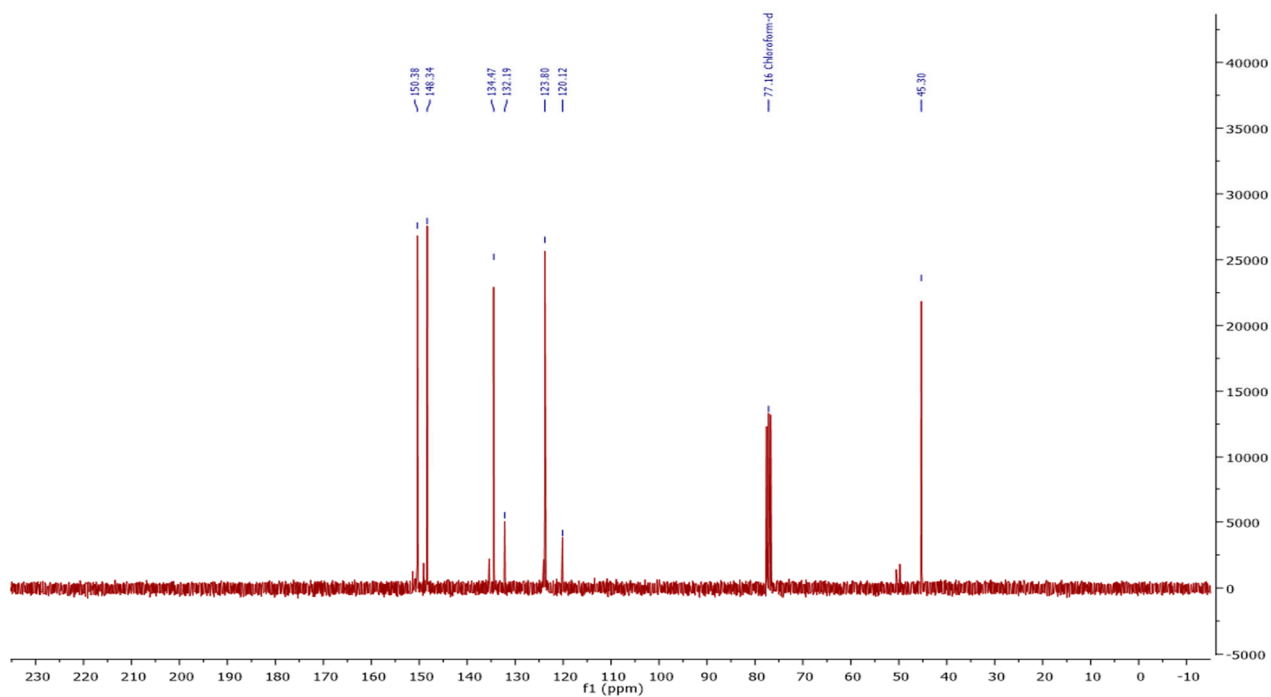

## Compound 17

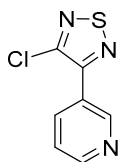

$^1\text{H}$  NMR spectrum

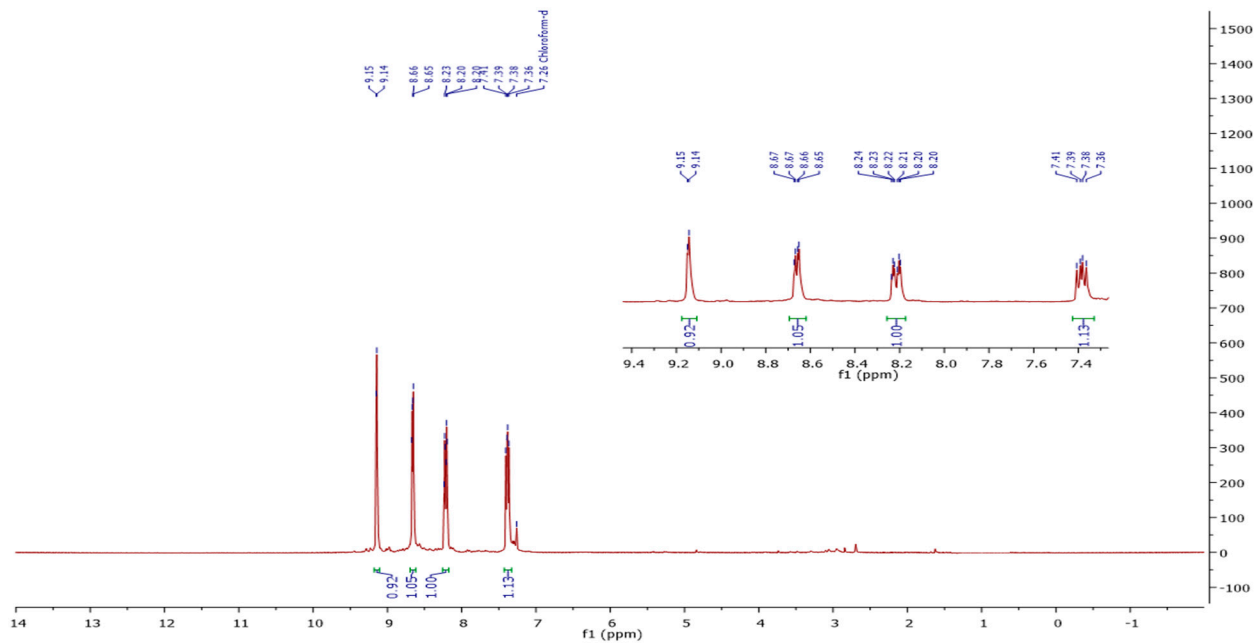

$^{13}\text{C}$  NMR spectrum

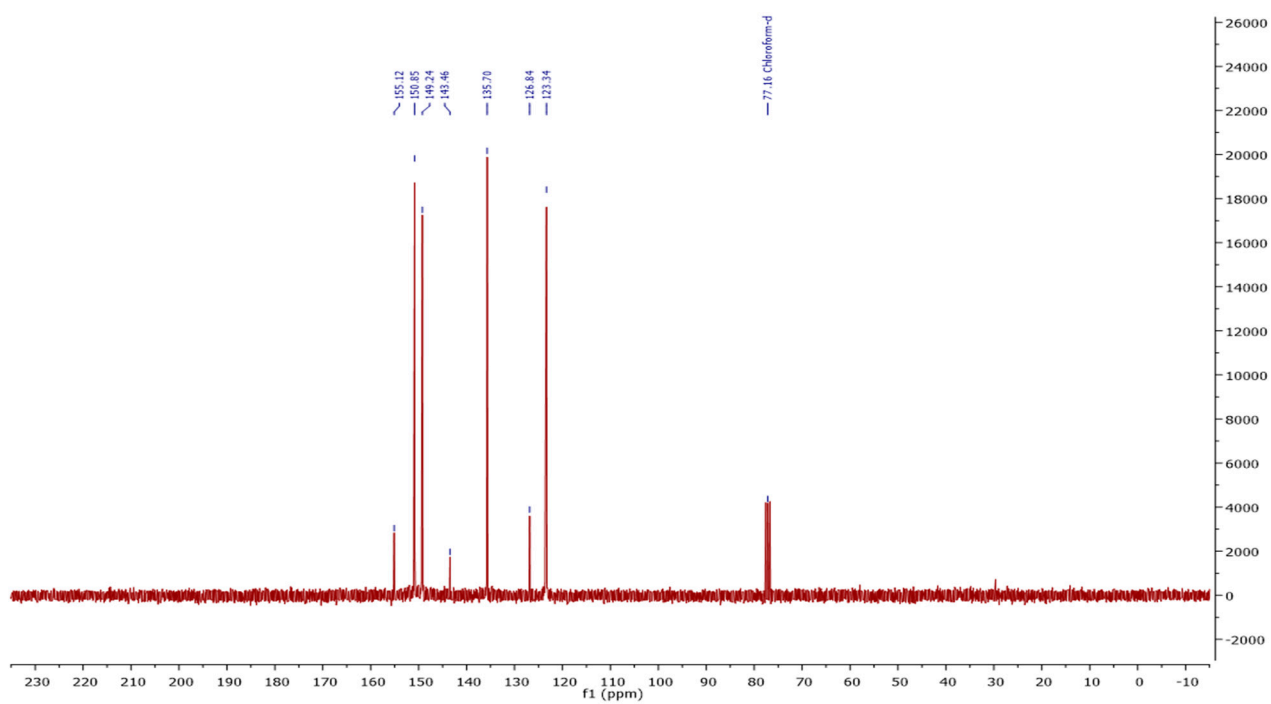

CCCCCOc1nc2ccccc2n1

<sup>1</sup>H NMR spectrum of compound 10 in CDCl<sub>3</sub>. The spectrum shows peaks in the aromatic region (7.4-9.4 ppm) and aliphatic region (1.0-2.0 ppm). Integration values are provided for several peaks: 0.69, 0.77, 0.77, 0.86, 1.83, 1.88, 6.53, and 3.00. A solvent peak for CHCl<sub>3</sub> is visible at 7.26 ppm.

13C NMR spectrum of 77.16 Chloroform-d. The x-axis is chemical shift f1 (ppm) from 230 to -10. The y-axis is intensity from 0 to 30000. Peaks are labeled with their chemical shifts: 162.87, 150.13, 148.87, 144.57, 134.68, 127.69, 123.38, 77.16 Chloroform-d, 71.47, 31.46, 30.00, 25.71, 22.56, and 14.02.

## Compound 19

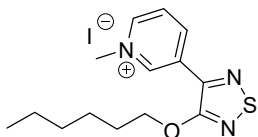

$^1\text{H}$  NMR spectrum

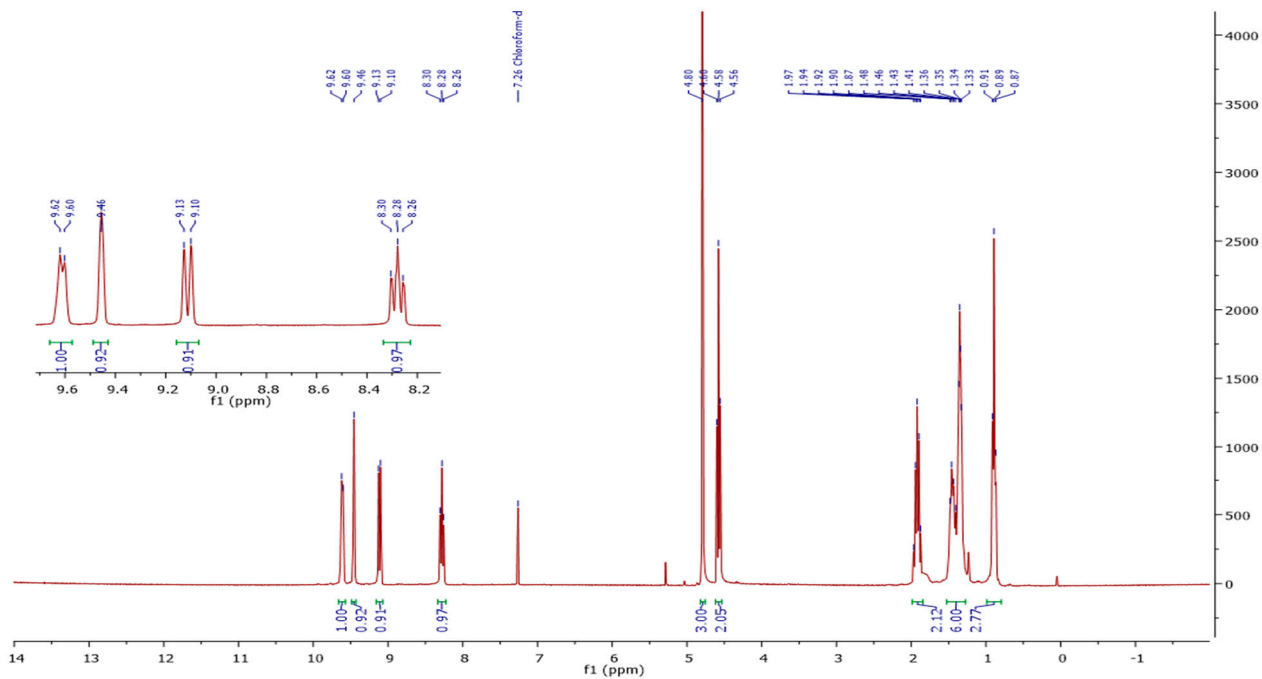

$^{13}\text{C}$  NMR spectrum

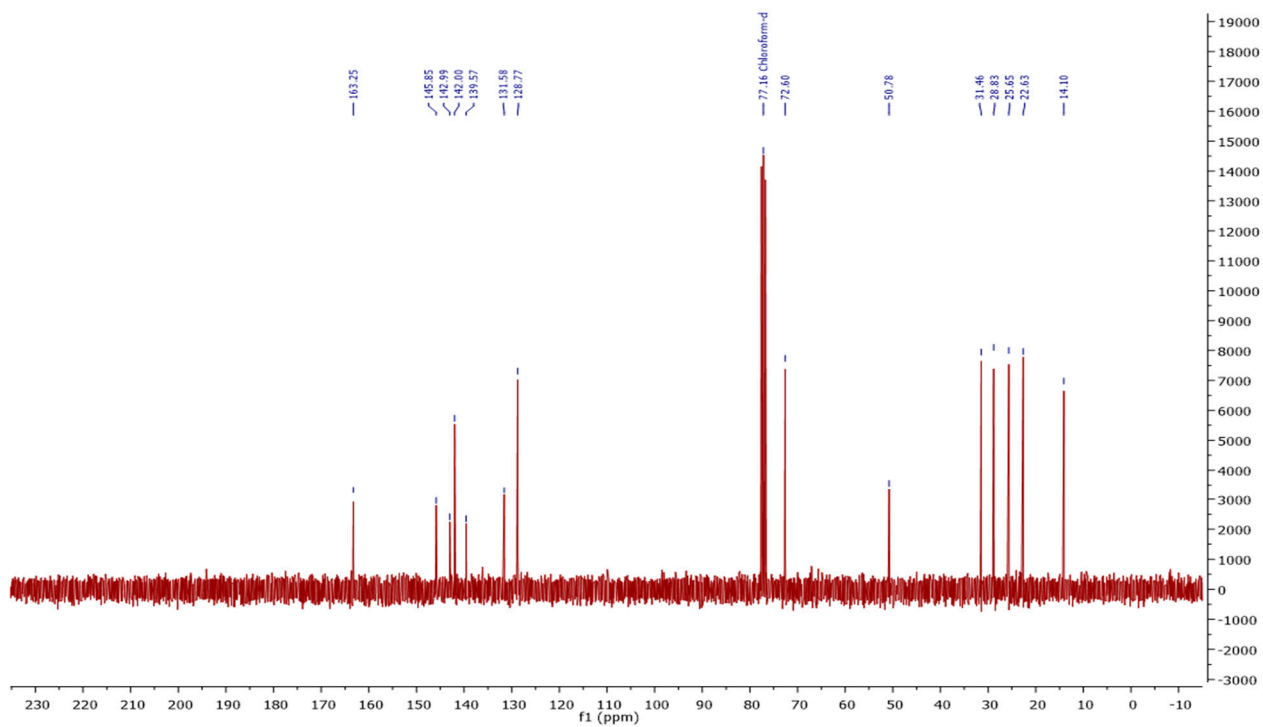

# Compound 10

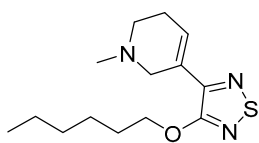

## $^1\text{H}$ NMR spectrum

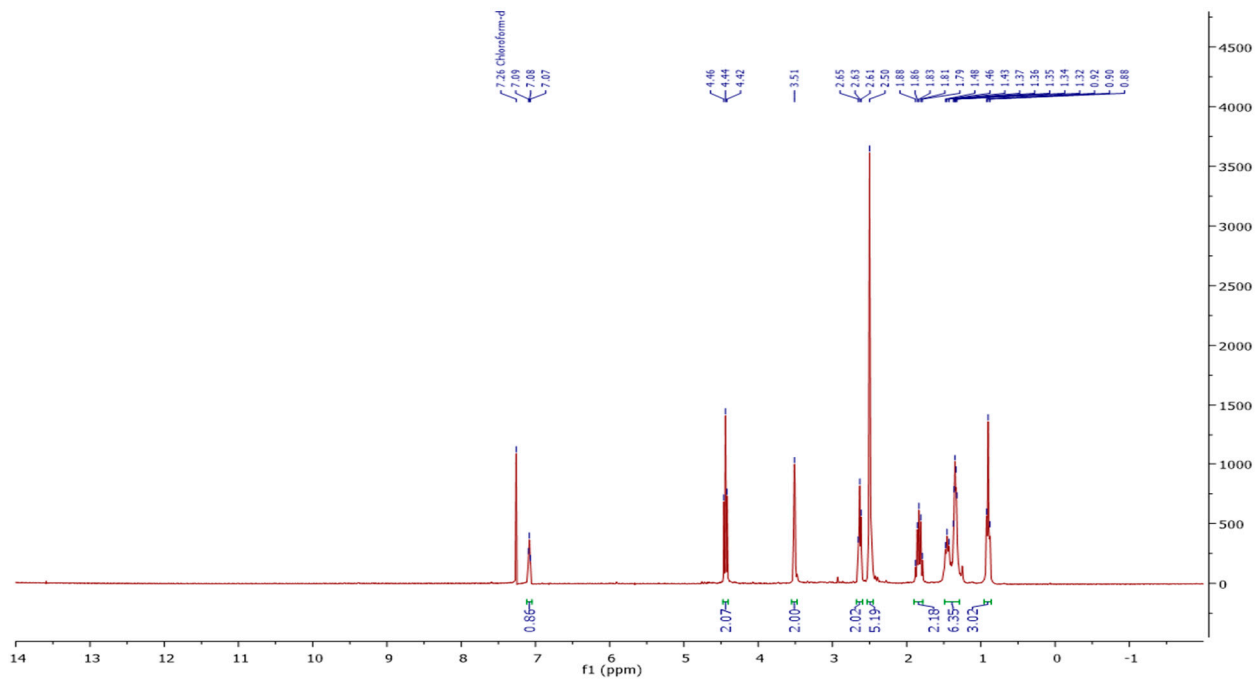

## $^{13}\text{C}$ NMR spectrum

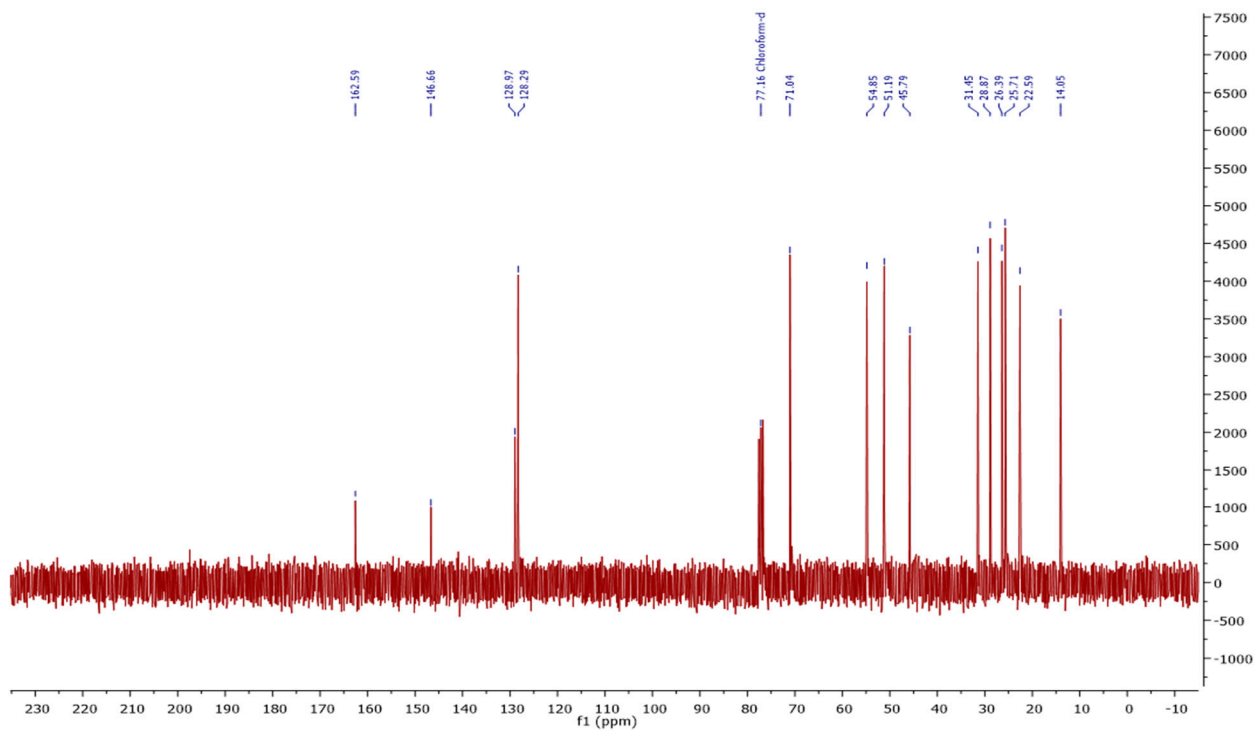

## 22-C3

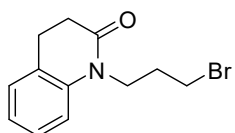

$^1\text{H}$  NMR spectrum

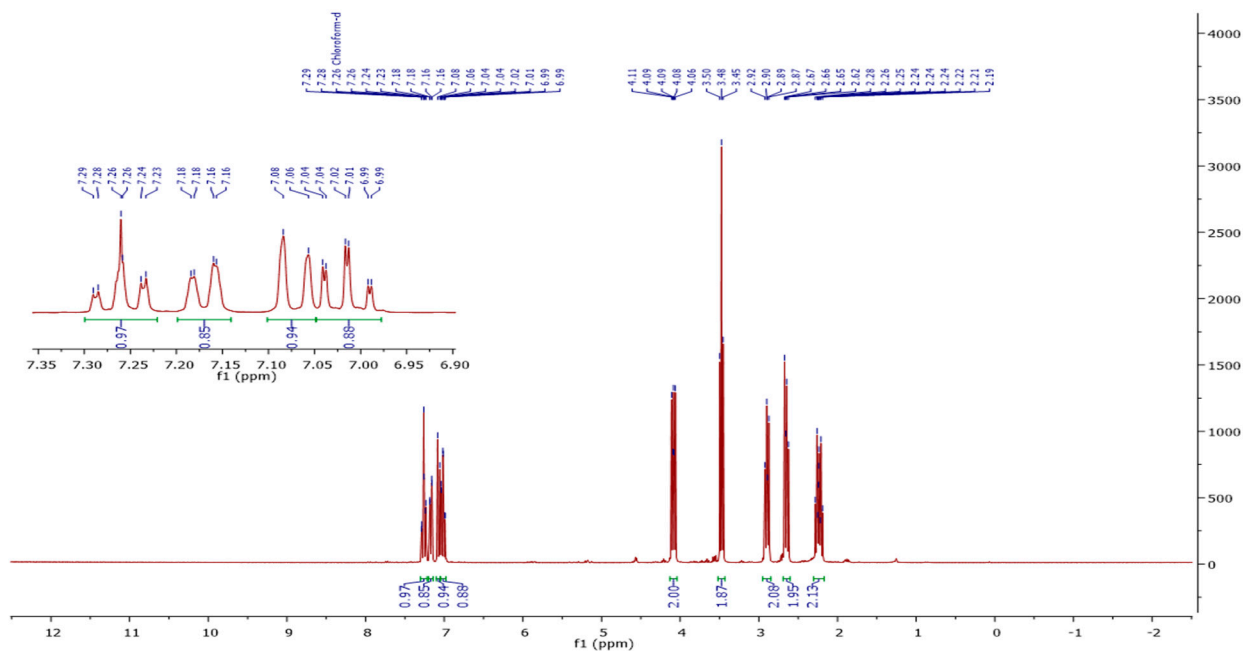

$^{13}\text{C}$  NMR spectrum

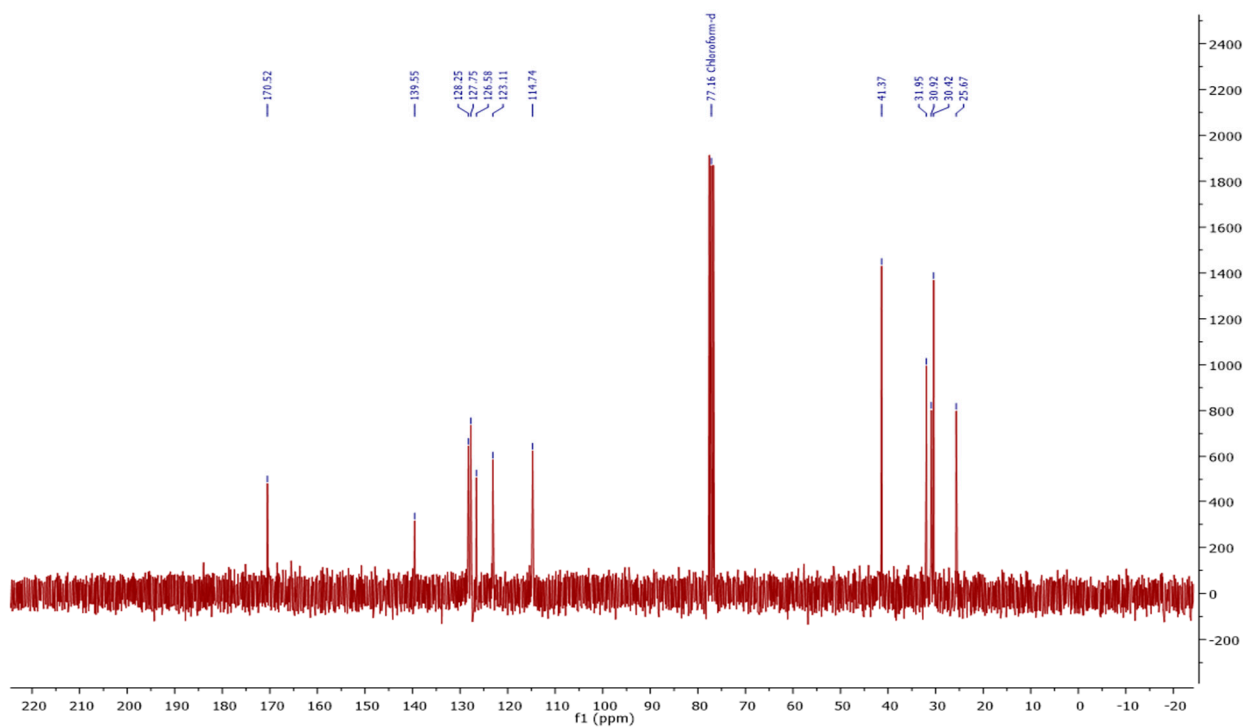

## 22-C5

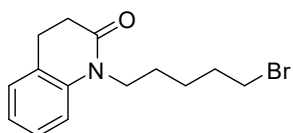

### $^1\text{H}$ NMR spectrum

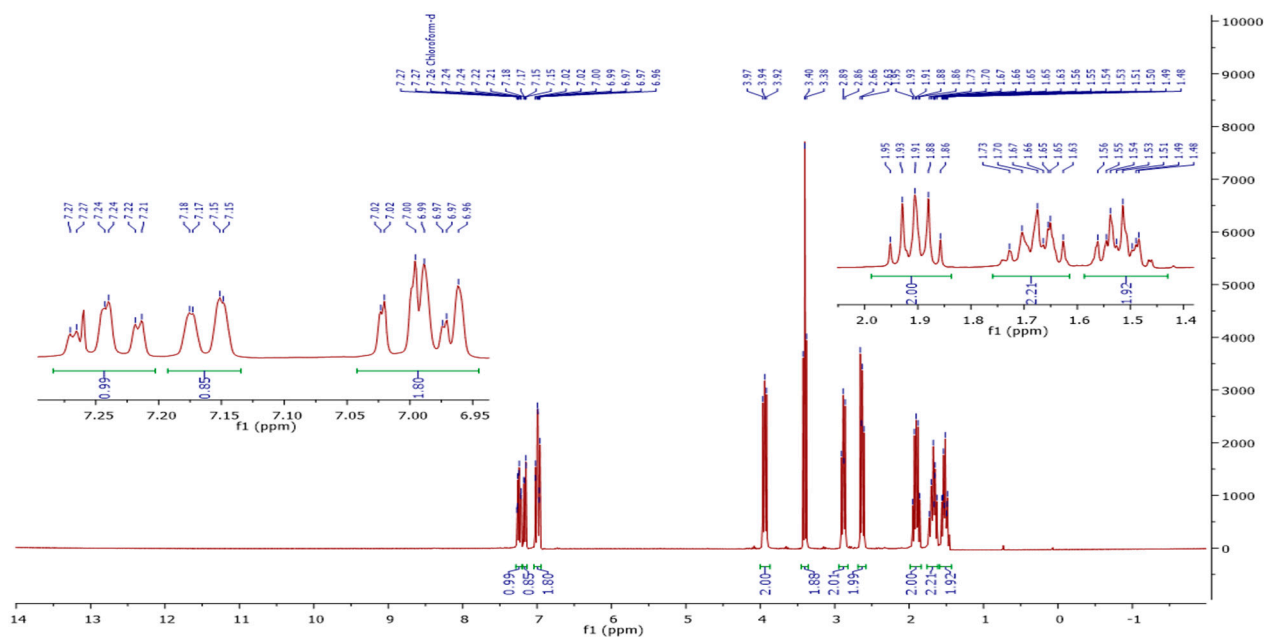

### $^{13}\text{C}$ NMR spectrum

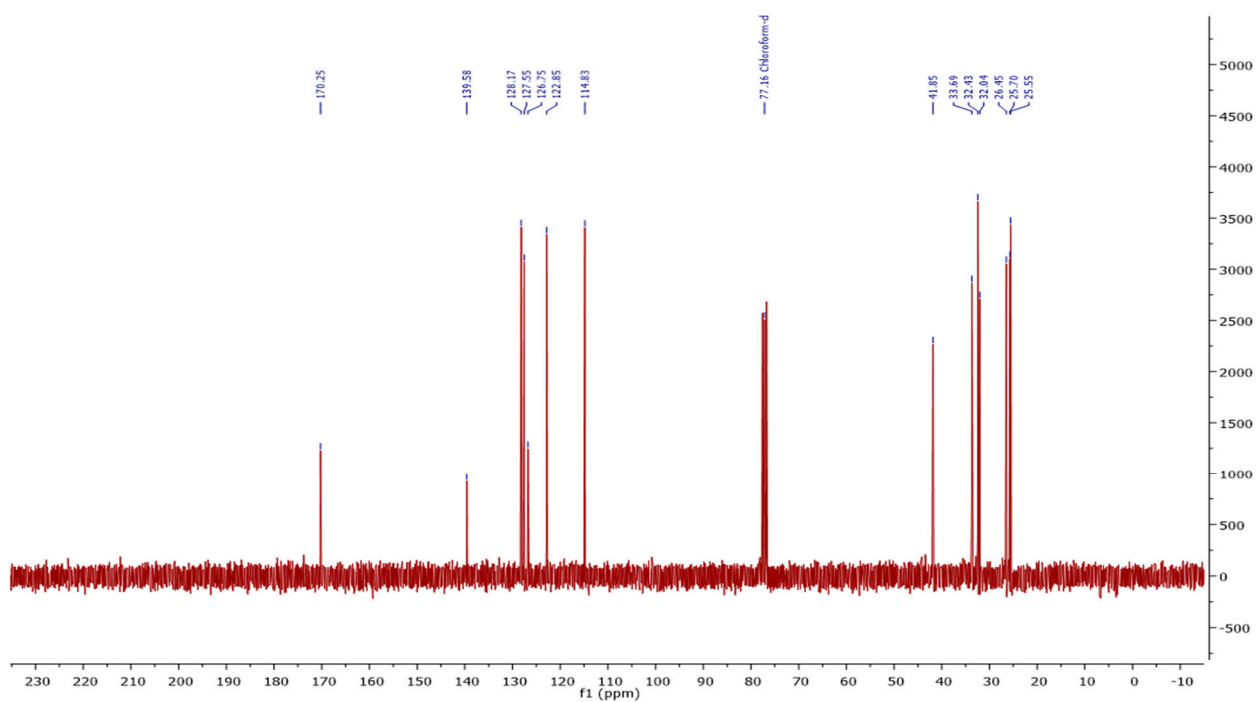

22-C7

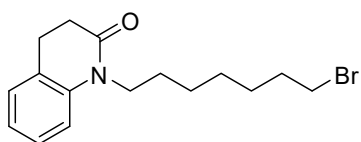

$^1\text{H}$  NMR spectrum

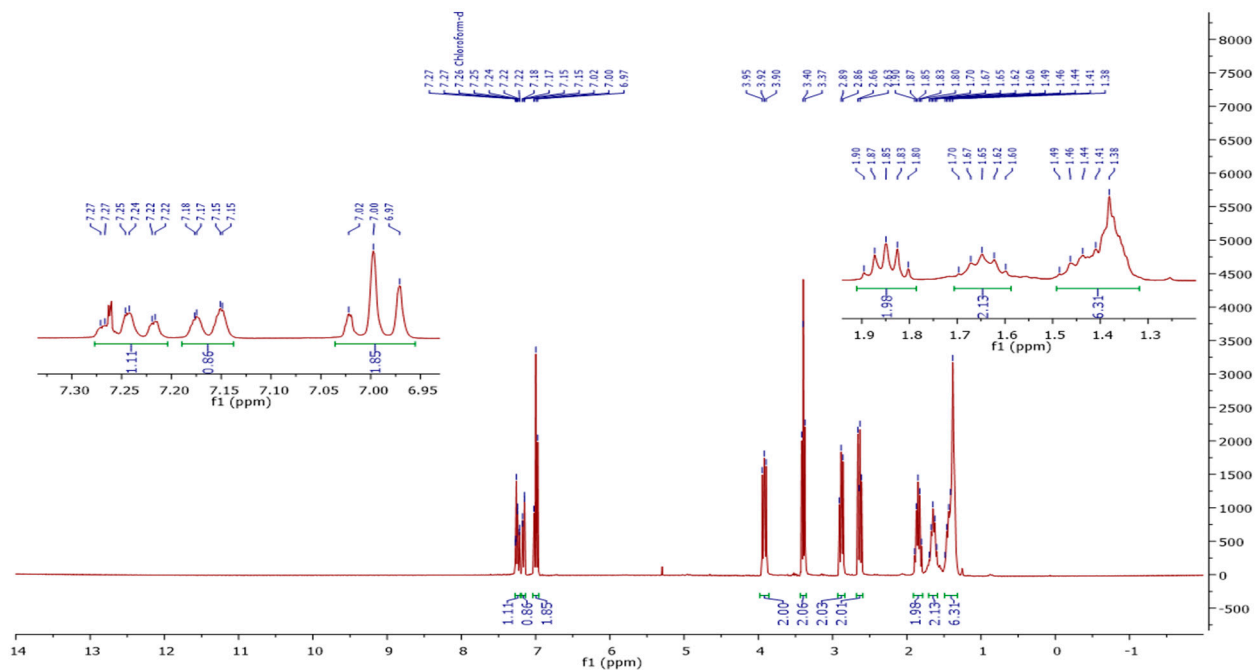

$^{13}\text{C}$  NMR spectrum

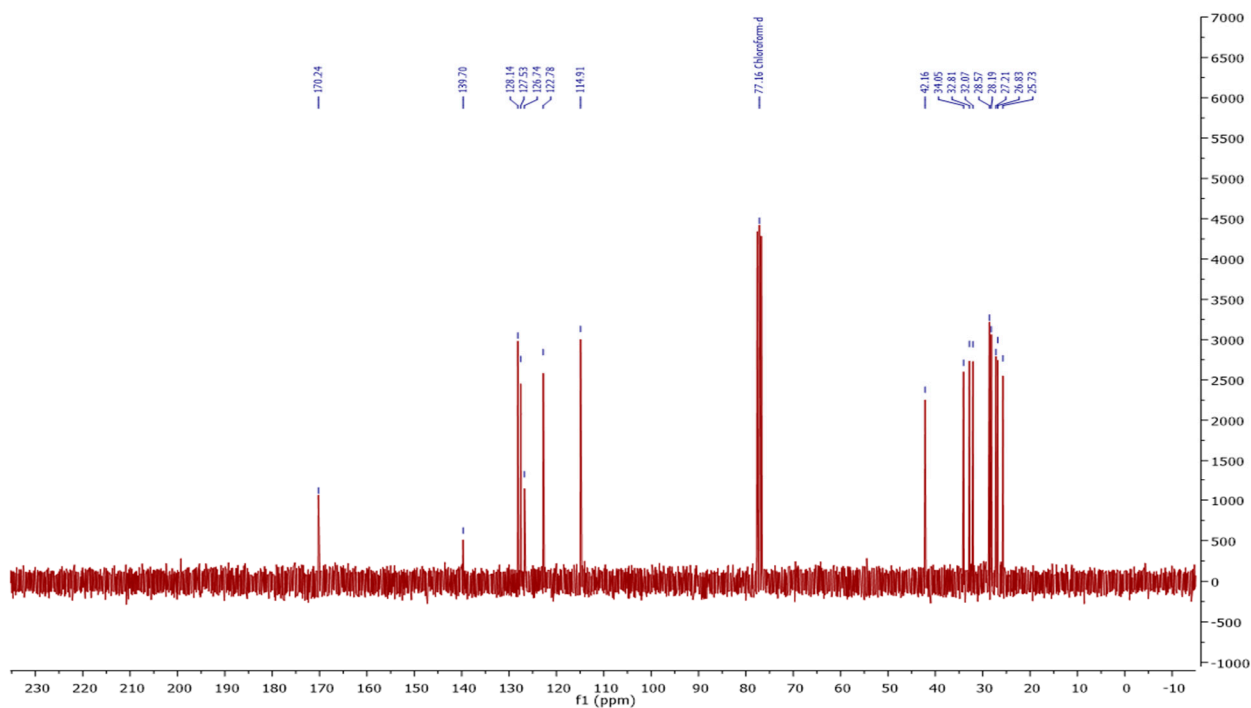

BrCCCCCCCCN1C(=O)CCc2ccccc12

Figure 1 displays three  $^1\text{H}$  NMR spectra of compound **1**. The top spectrum shows the full range from 14 to -1 ppm. The middle spectrum is an expansion of the aromatic region (7.35–6.95 ppm), and the bottom spectrum is an expansion of the aliphatic region (2.1–1.1 ppm). Integration values are provided for each peak group.

**Chemical Shifts (ppm):**

- Aromatic region (7.35–6.95 ppm):** 7.27, 7.24, 7.21, 7.17, 7.15, 7.02, 6.97.
- Aliphatic region (2.1–1.1 ppm):** 1.89, 1.87, 1.84, 1.82, 1.80, 1.66, 1.64, 1.62, 1.61, 1.59, 1.41, 1.39, 1.32, 1.31, 1.30, 1.26.

**Integration values:**

- Aromatic region (7.35–6.95 ppm):** 1.18, 0.87, 1.86.
- Aliphatic region (2.1–1.1 ppm):** 1.89, 2.36, 10.20.

13C NMR spectrum of 1,3-bis(4-chlorophenyl)propan-2-ol in CDCl<sub>3</sub>. The spectrum shows peaks at 170.22, 139.78, 128.12, 127.52, 126.77, 122.75, 114.95, 77.16 (CDCl<sub>3</sub>), 42.26, 34.13, 32.84, 32.10, 29.46, 29.24, 28.80, 28.27, 27.32, 26.99, and 25.76 ppm. The x-axis is labeled 'f1 (ppm)' and ranges from 230 to -10. The y-axis ranges from -500 to 6000.

## 23-C3

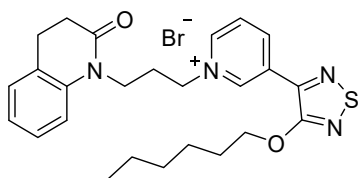

$^1\text{H}$  NMR spectrum

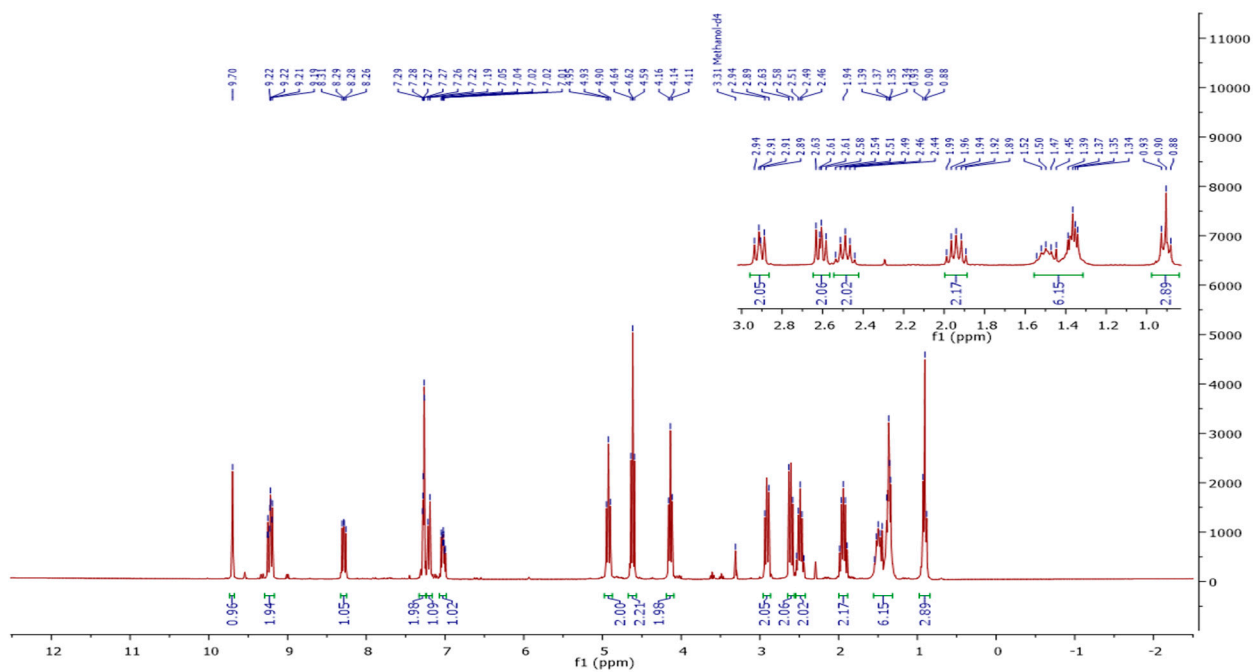

$^{13}\text{C}$  NMR spectrum

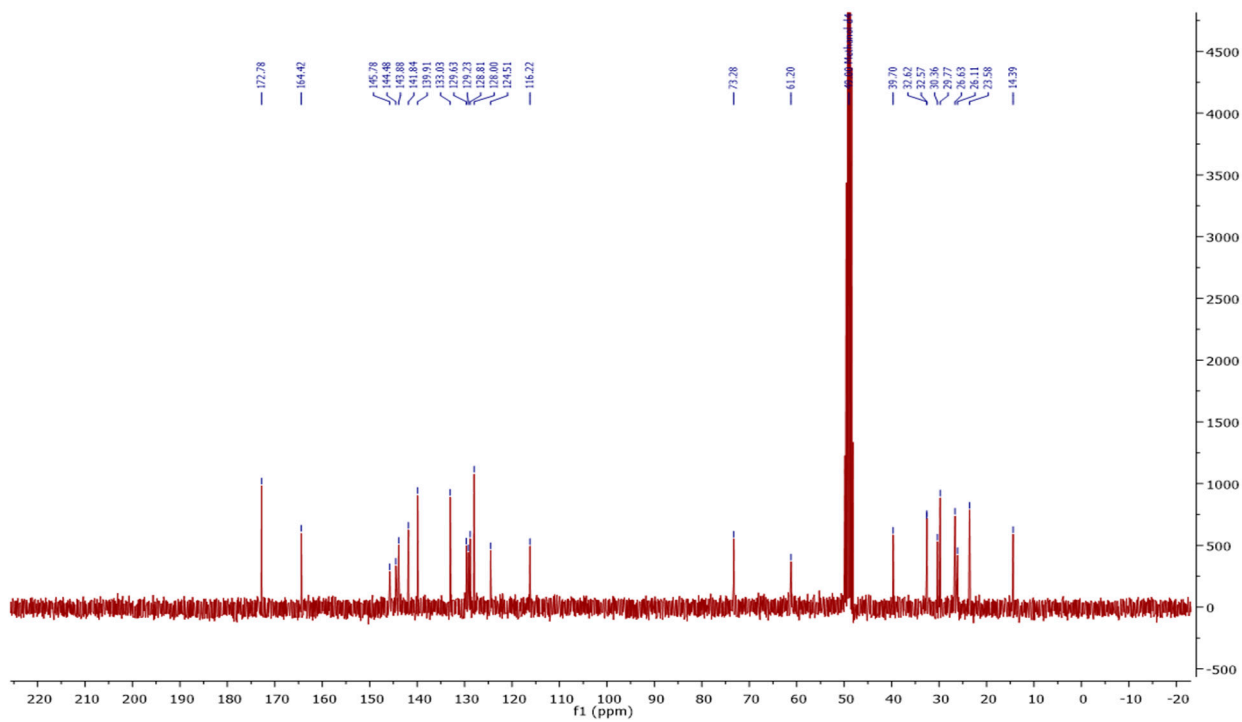

## 23-C5

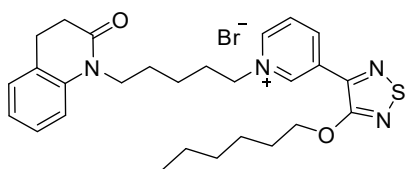

$^1\text{H}$  NMR spectrum

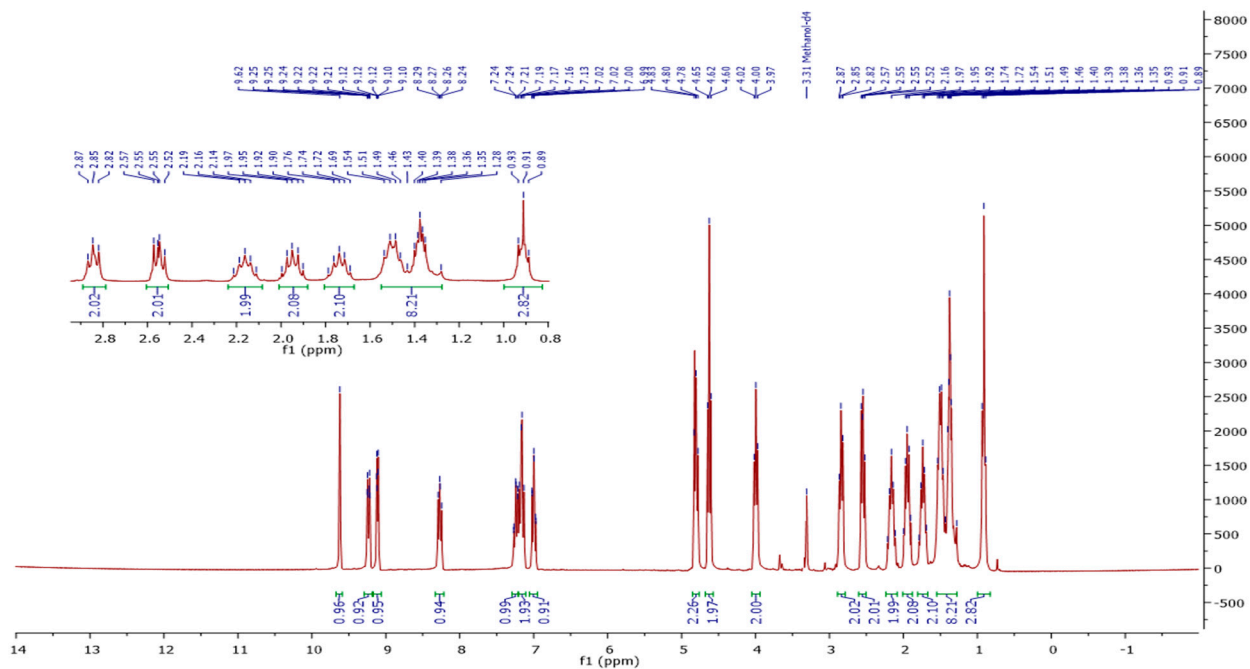

$^{13}\text{C}$  NMR spectrum

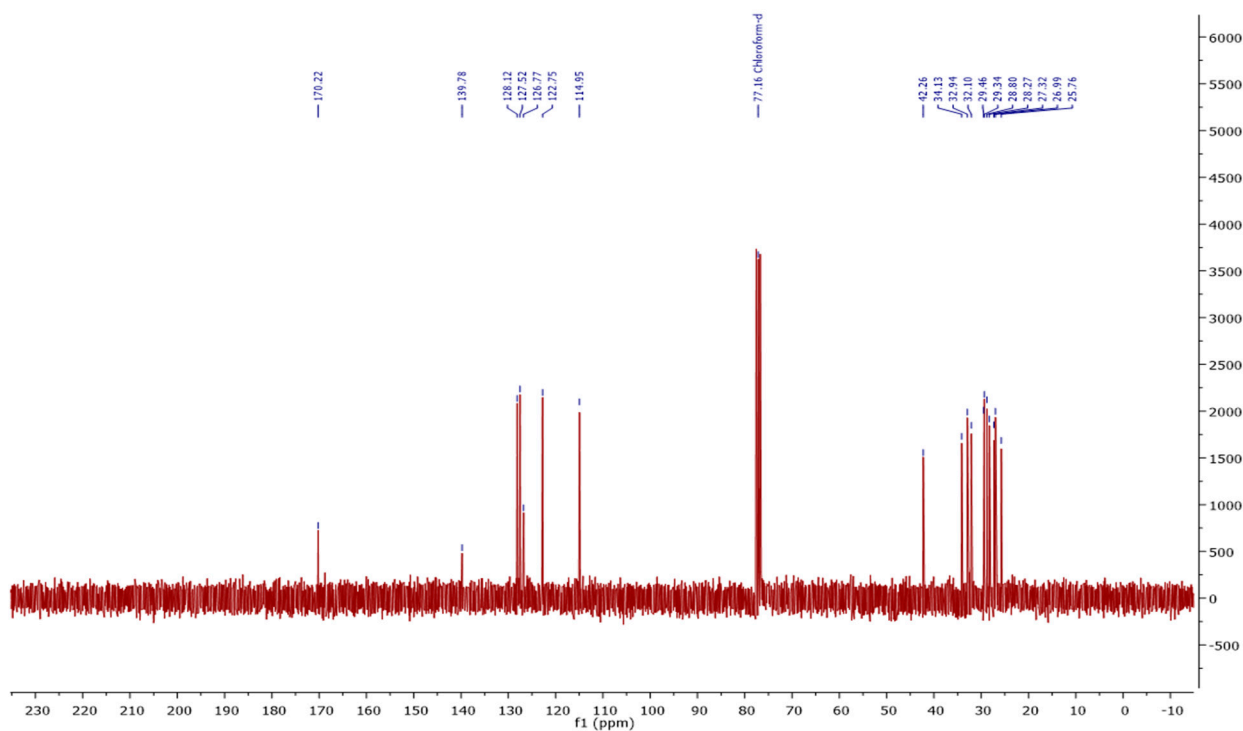

CCCCCCCCN1C(=O)Cc2ccccc21.[Br-].CCCCCOc1ncnc1-c1ccc[n+]1

**<sup>1</sup>H NMR (400 MHz, CDCl<sub>3</sub>)**

| Chemical Shift (ppm) | Integration |
|----------------------|-------------|
| 3.94                 | 2.10        |
| 3.89                 | 2.10        |
| 3.85                 | 2.10        |
| 3.82                 | 2.10        |
| 3.78                 | 2.10        |
| 3.75                 | 2.10        |
| 3.72                 | 2.10        |
| 3.68                 | 2.10        |
| 3.65                 | 2.10        |
| 3.62                 | 2.10        |
| 3.58                 | 2.10        |
| 3.55                 | 2.10        |
| 3.52                 | 2.10        |
| 3.48                 | 2.10        |
| 3.45                 | 2.10        |
| 3.42                 | 2.10        |
| 3.38                 | 2.10        |
| 3.35                 | 2.10        |
| 3.32                 | 2.10        |
| 3.28                 | 2.10        |
| 3.25                 | 2.10        |
| 3.22                 | 2.10        |
| 3.18                 | 2.10        |
| 3.15                 | 2.10        |
| 3.12                 | 2.10        |
| 3.08                 | 2.10        |
| 3.05                 | 2.10        |
| 3.02                 | 2.10        |
| 2.98                 | 2.10        |
| 2.95                 | 2.10        |
| 2.92                 | 2.10        |
| 2.88                 | 2.10        |
| 2.85                 | 2.10        |
| 2.82                 | 2.10        |
| 2.78                 | 2.10        |
| 2.75                 | 2.10        |
| 2.72                 | 2.10        |
| 2.68                 | 2.10        |
| 2.65                 | 2.10        |
| 2.62                 | 2.10        |
| 2.58                 | 2.10        |
| 2.55                 | 2.10        |
| 2.52                 | 2.10        |
| 2.48                 | 2.10        |
| 2.45                 | 2.10        |
| 2.42                 | 2.10        |
| 2.38                 | 2.10        |
| 2.35                 | 2.10        |
| 2.32                 | 2.10        |
| 2.28                 | 2.10        |
| 2.25                 | 2.10        |
| 2.22                 | 2.10        |
| 2.18                 | 2.10        |
| 2.15                 | 2.10        |
| 2.12                 | 2.10        |
| 2.08                 | 2.10        |
| 2.05                 | 2.10        |
| 2.02                 | 2.10        |
| 1.98                 | 2.10        |
| 1.95                 | 2.10        |
| 1.92                 | 2.10        |
| 1.88                 | 2.10        |
| 1.85                 | 2.10        |
| 1.82                 | 2.10        |
| 1.78                 | 2.10        |
| 1.75                 | 2.10        |
| 1.72                 | 2.10        |
| 1.68                 | 2.10        |
| 1.65                 | 2.10        |
| 1.62                 | 2.10        |
| 1.58                 | 2.10        |
| 1.55                 | 2.10        |
| 1.52                 | 2.10        |
| 1.48                 | 2.10        |
| 1.45                 | 2.10        |
| 1.42                 | 2.10        |
| 1.38                 | 2.10        |
| 1.35                 | 2.10        |
| 1.32                 | 2.10        |
| 1.28                 | 2.10        |
| 1.25                 | 2.10        |
| 1.22                 | 2.10        |
| 1.18                 | 2.10        |
| 1.15                 | 2.10        |
| 1.12                 | 2.10        |
| 1.08                 | 2.10        |
| 1.05                 | 2.10        |
| 1.02                 | 2.10        |
| 0.98                 | 2.10        |
| 0.95                 | 2.10        |
| 0.92                 | 2.10        |
| 0.88                 | 2.10        |
| 0.85                 | 2.10        |
| 0.82                 | 2.10        |
| 0.78                 | 2.10        |
| 0.75                 | 2.10        |
| 0.72                 | 2.10        |
| 0.68                 | 2.10        |
| 0.65                 | 2.10        |
| 0.62                 | 2.10        |
| 0.58                 | 2.10        |
| 0.55                 | 2.10        |
| 0.52                 | 2.10        |
| 0.48                 | 2.10        |
| 0.45                 | 2.10        |
| 0.42                 | 2.10        |
| 0.38                 | 2.10        |
| 0.35                 | 2.10        |
| 0.32                 | 2.10        |
| 0.28                 | 2.10        |
| 0.25                 | 2.10        |
| 0.22                 | 2.10        |
| 0.18                 | 2.10        |
| 0.15                 | 2.10        |
| 0.12                 | 2.10        |
| 0.08                 | 2.10        |
| 0.05                 | 2.10        |
| 0.02                 | 2.10        |
| 0.98                 | 2.10        |
| 0.95                 | 2.10        |
| 0.92                 | 2.10        |
| 0.88                 | 2.10        |
| 0.85                 | 2.10        |
| 0.82                 | 2.10        |
| 0.78                 | 2.10        |
| 0.75                 | 2.10        |
| 0.72                 | 2.10        |
| 0.68                 | 2.10        |
| 0.65                 | 2.10        |
| 0.62                 | 2.10        |
| 0.58                 | 2.10        |
| 0.55                 | 2.10        |
| 0.52                 | 2.10        |
| 0.48                 | 2.10        |
| 0.45                 | 2.10        |
| 0.42                 | 2.10        |
| 0.38                 | 2.10        |
| 0.35                 | 2.10        |
| 0.32                 | 2.10        |
| 0.28                 | 2.10        |
| 0.25                 | 2.10        |
| 0.22                 | 2.10        |
| 0.18                 | 2.10        |
| 0.15                 | 2.10        |
| 0.12                 | 2.10        |
| 0.08                 | 2.10        |
| 0.05                 | 2.10        |
| 0.02                 | 2.10        |

**<sup>13</sup>C NMR (100 MHz, CDCl<sub>3</sub>)**

| Chemical Shift (ppm) |
|----------------------|
| 21.11                |
| 21.09                |
| 21.07                |
| 21.05                |
| 21.03                |
| 21.01                |
| 20.99                |
| 20.97                |
| 20.95                |
| 20.93                |
| 20.91                |
| 20.89                |
| 20.87                |
| 20.85                |
| 20.83                |
| 20.81                |
| 20.79                |
| 20.77                |
| 20.75                |
| 20.73                |
| 20.71                |
| 20.69                |
| 20.67                |
| 20.65                |
| 20.63                |
| 20.61                |
| 20.59                |
| 20.57                |
| 20.55                |

172.09  
164.30  
146.64  
144.11  
143.88  
143.88  
140.04  
137.85  
129.67  
128.99  
128.58  
128.58  
124.12  
116.26  
73.21  
63.28  
49.00 Methanol-d4  
42.14  
32.68  
32.52  
29.72  
27.54  
26.14  
24.08  
23.54

## 23-C9

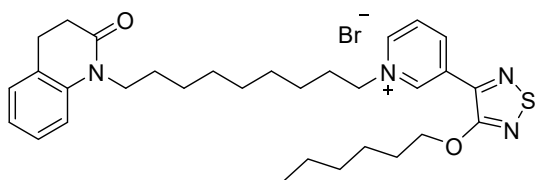

<sup>1</sup>H NMR spectrum

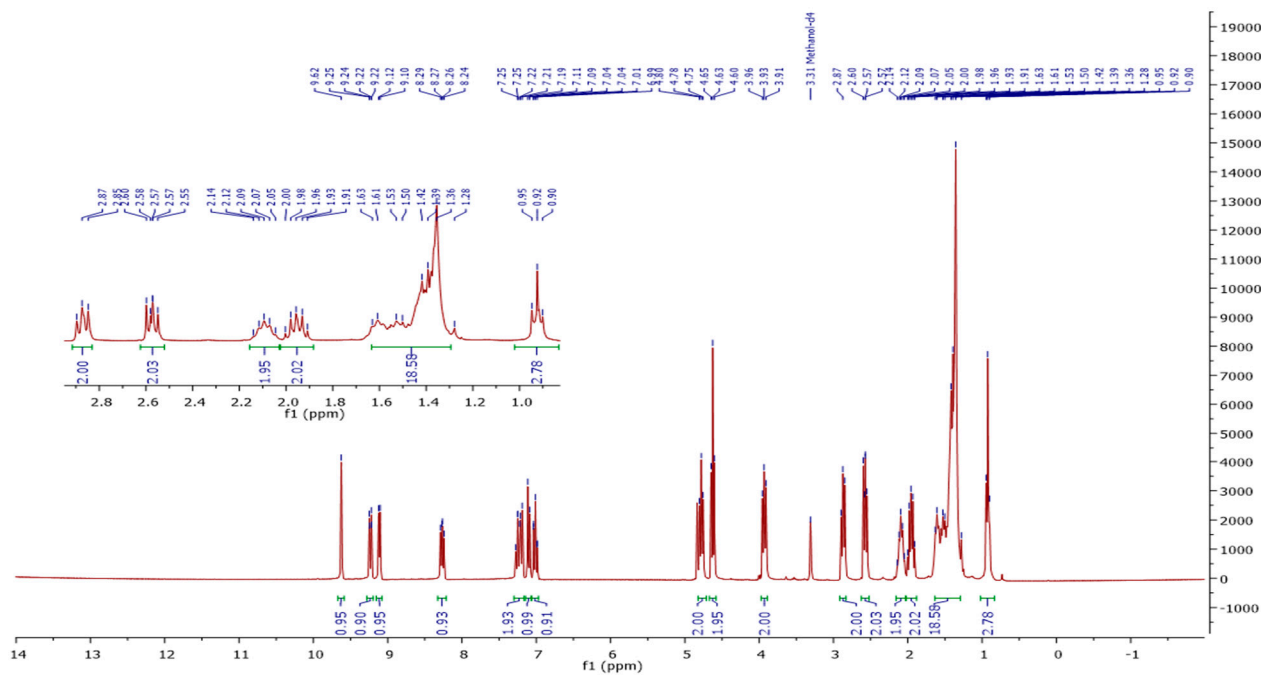

<sup>13</sup>C NMR spectrum

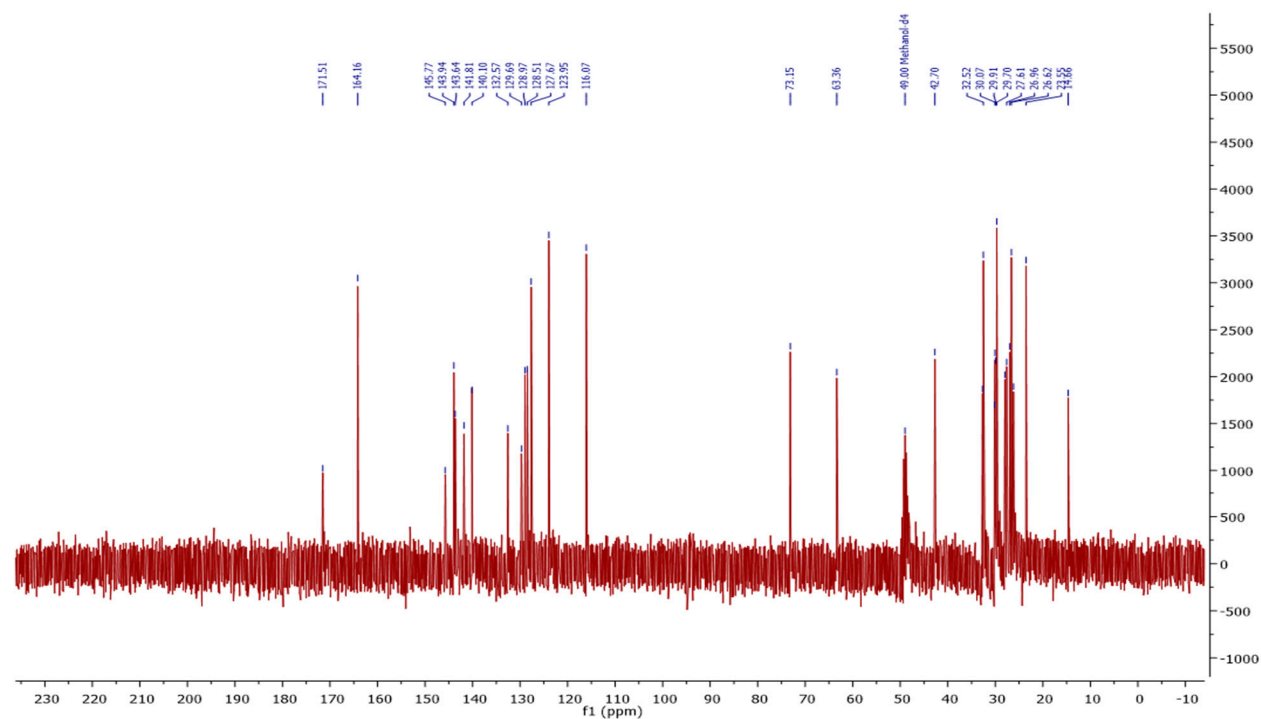

### 13-C3

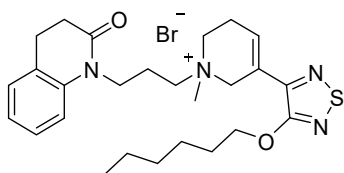

$^1\text{H}$  NMR spectrum

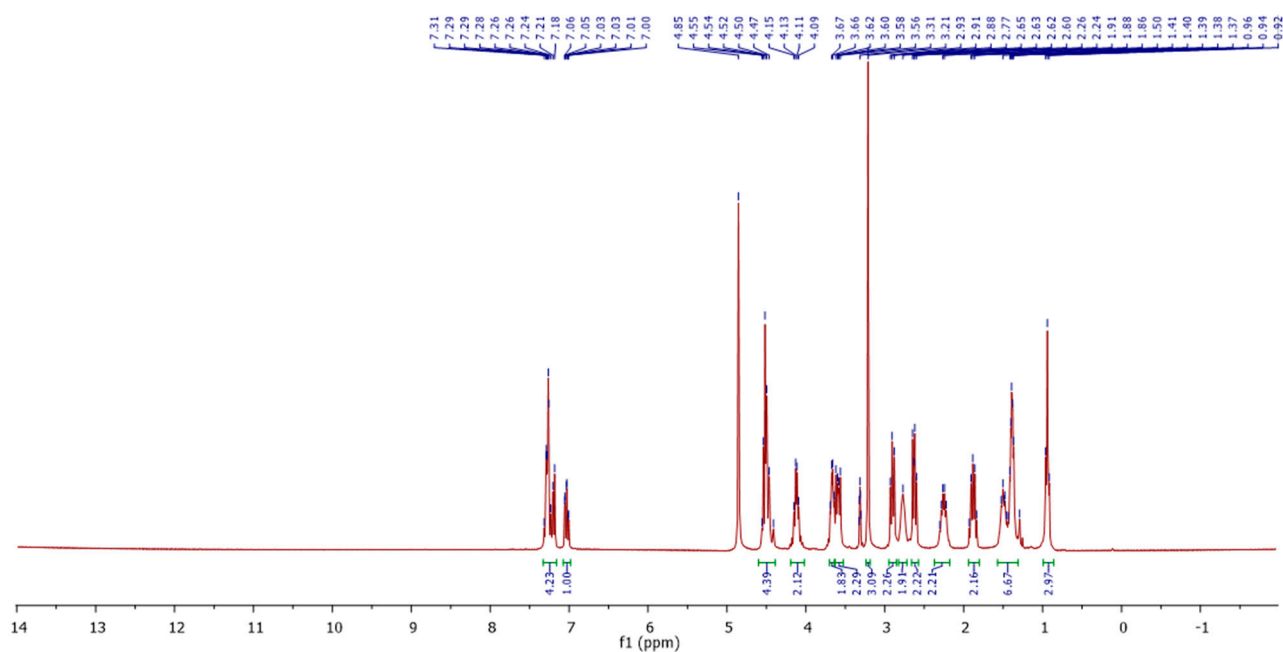

$^{13}\text{C}$  NMR spectrum

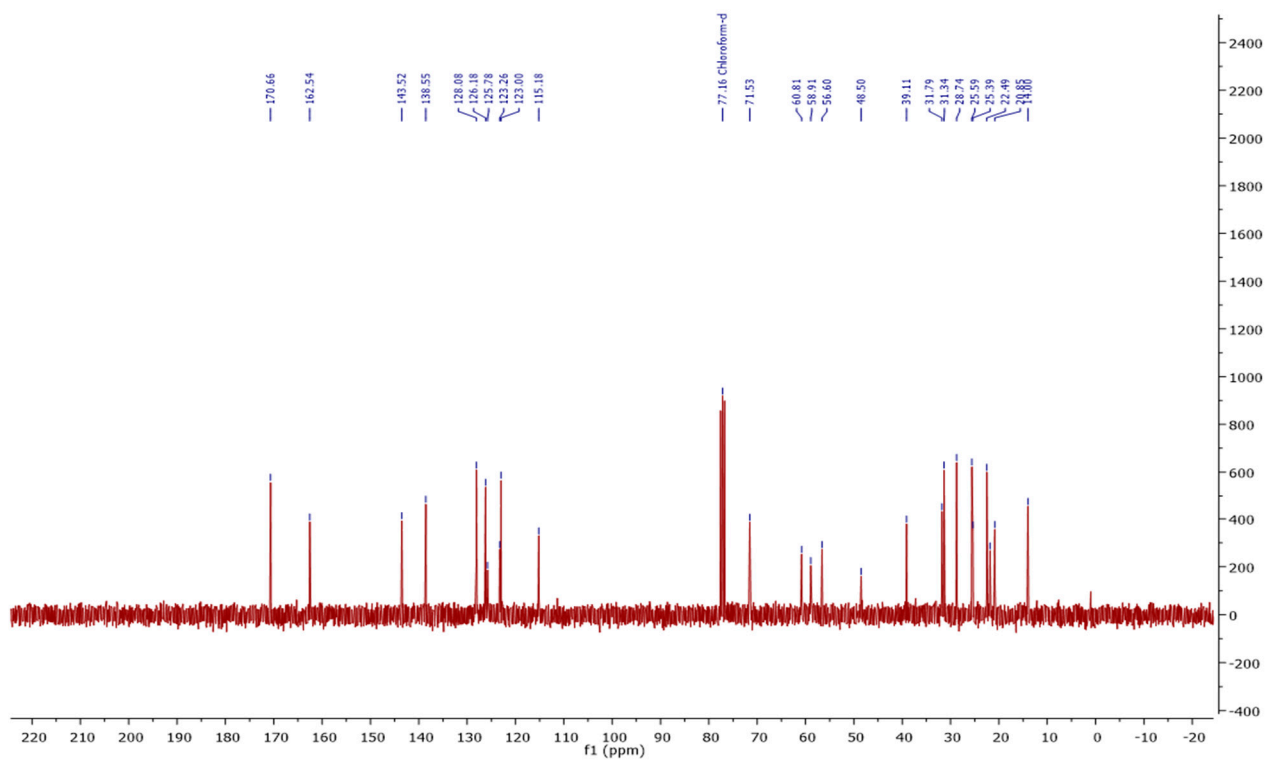

a.i.

ESI positive, 11-C3, < 1 ug/mL (MeOH), BB mode, 3 jul 2017  
Resolution (m/z 469) = 36.000, Flow Rate = 120 uL/h

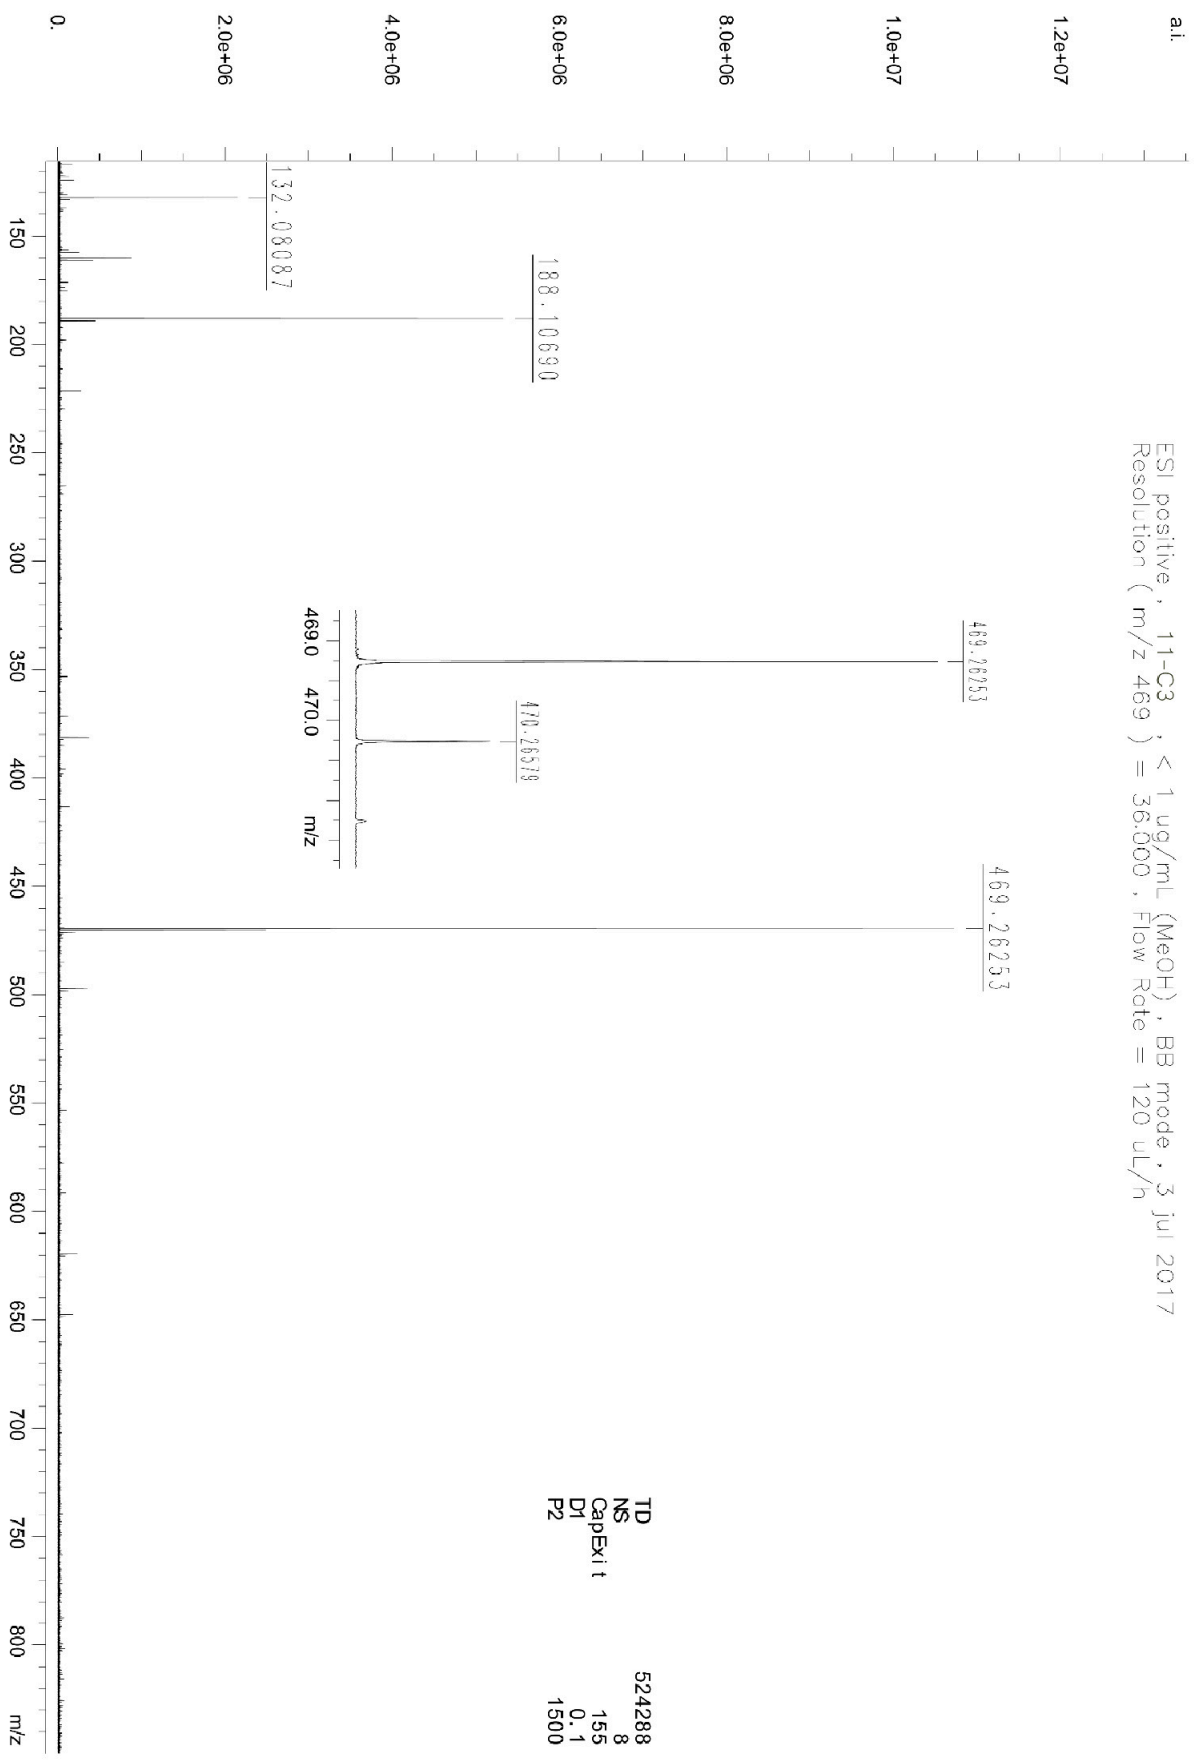

CCCCCCCCN1CCCCC1C2=NC=NC=S2OCCCC3C=CC=C(C=C3)C(=O)N4CCCCC4

<sup>1</sup>H NMR spectrum (CDCl<sub>3</sub>) of compound 2b. The x-axis represents the chemical shift f1 (ppm) from 12 to -2. The y-axis represents the intensity from 0 to 10000. The spectrum shows several peaks with corresponding integrations and chemical shift values.

| Chemical Shift (ppm) | Integration |
|----------------------|-------------|
| 7.26                 | 2.00        |
| 7.17                 | 1.04        |
| 7.16                 | 2.06        |
| 7.14                 |             |
| 7.12                 |             |
| 7.11                 |             |
| 7.05                 |             |
| 7.05                 |             |
| 7.03                 |             |
| 7.02                 |             |
| 6.91                 |             |
| 6.88                 |             |
| 6.86                 |             |
| 6.85                 |             |
| 4.49                 | 2.15        |
| 4.36                 | 2.06        |
| 4.34                 |             |
| 4.32                 |             |
| 4.06                 |             |
| 4.04                 |             |
| 3.85                 | 1.12        |
| 3.83                 | 3.04        |
| 3.82                 | 2.06        |
| 3.67                 | 3.02        |
| 3.65                 |             |
| 3.64                 |             |
| 3.34                 |             |
| 2.76                 | 4.22        |
| 2.74                 | 2.17        |
| 2.50                 |             |
| 2.47                 |             |
| 1.74                 | 6.17        |
| 1.36                 |             |
| 1.34                 | 8.10        |
| 1.24                 |             |
| 1.22                 |             |
| 1.21                 |             |
| 0.79                 | 3.00        |
| 0.77                 |             |

170.14  
162.40  
143.53  
138.91  
127.88  
127.43  
126.21  
125.76  
122.95  
122.73  
119.69  
77.16 Chloroform-d  
71.33  
63.07  
58.60  
56.26  
49.92  
48.13  
41.02  
31.65  
31.14  
28.53  
25.39  
25.28  
22.29  
21.65

a.i.

ESI positive, 11-C5, < 1 ug/mL (MeOH), B3 mode, 3 Jul 2017  
Resolution (m/z 497) = 35,000, Flow Rate = 120 uL/h

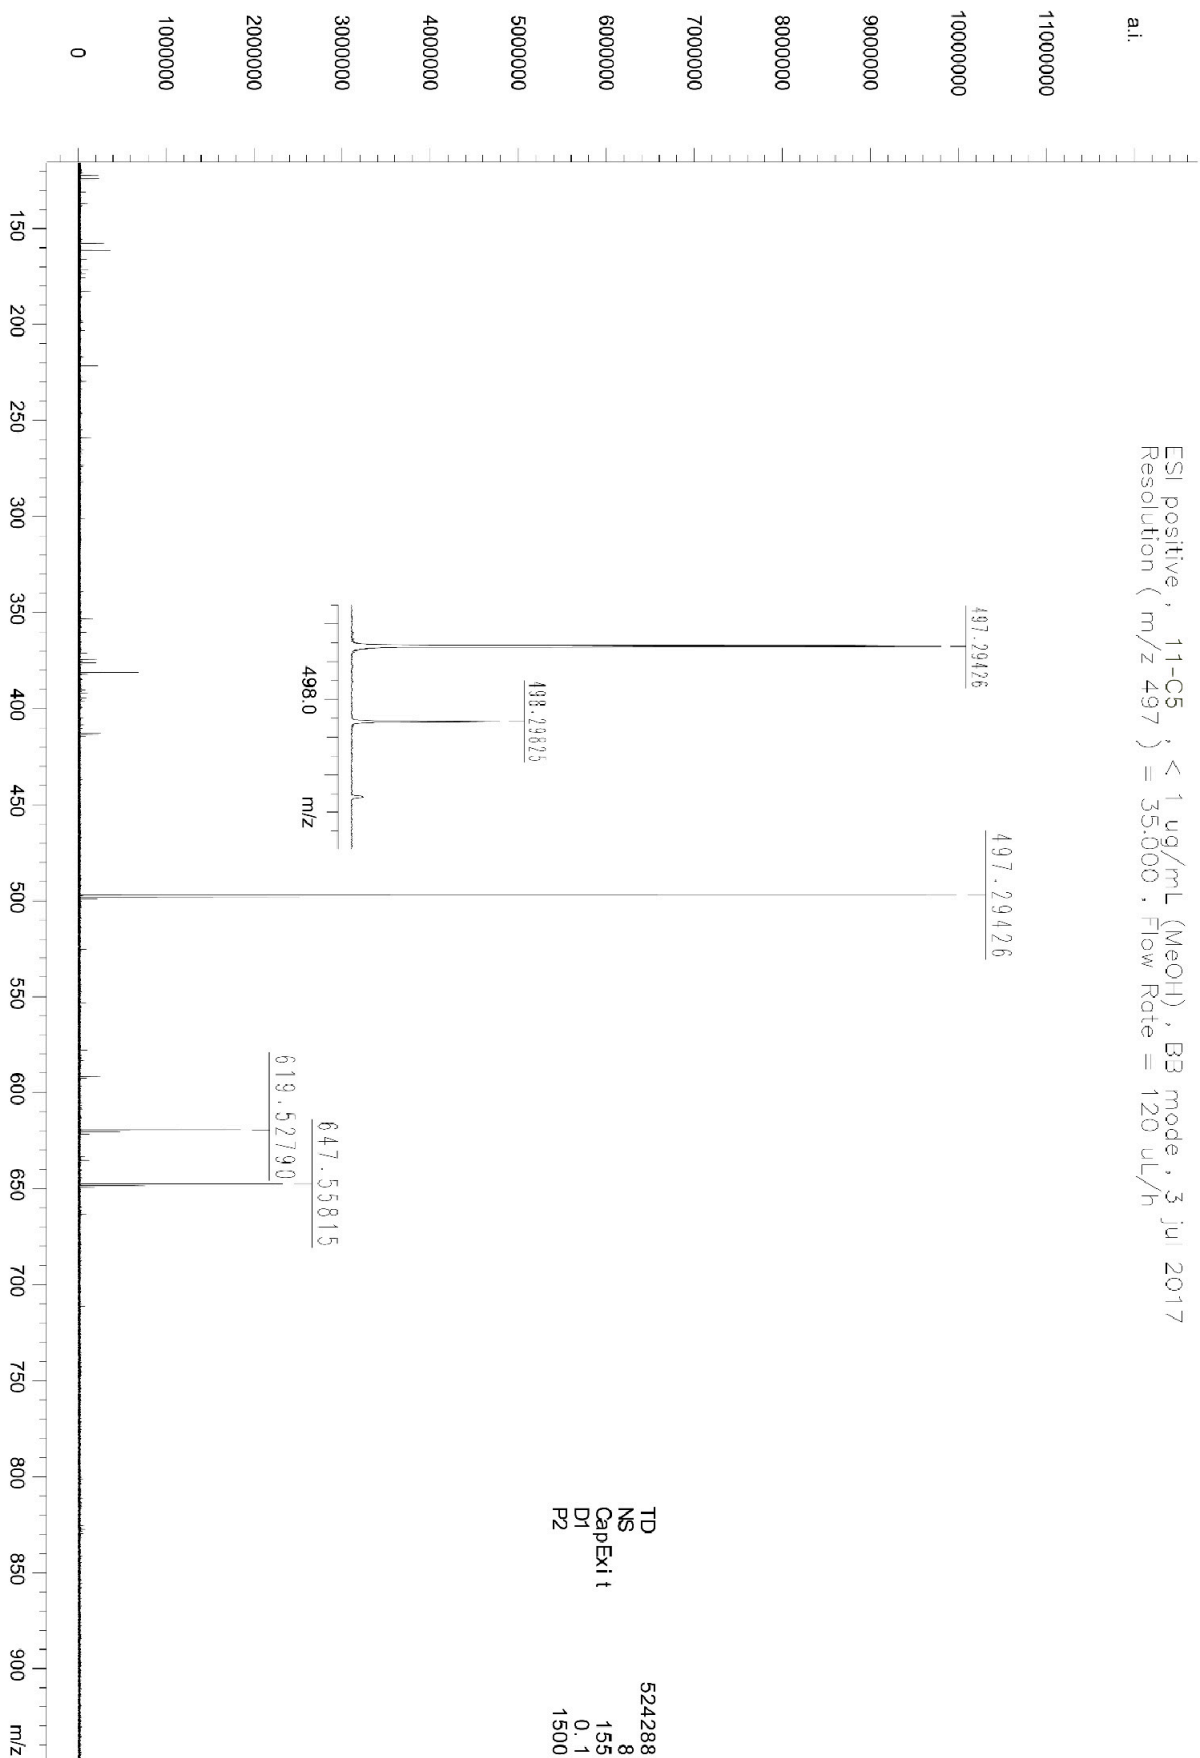

TD 524288  
NS 8  
CapExit 155  
D1 0.1  
P2 1500

13-C7

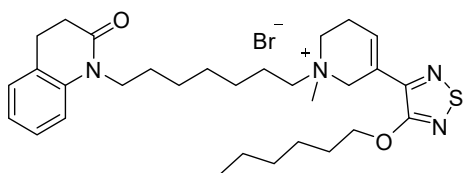

$^1\text{H}$  NMR spectrum

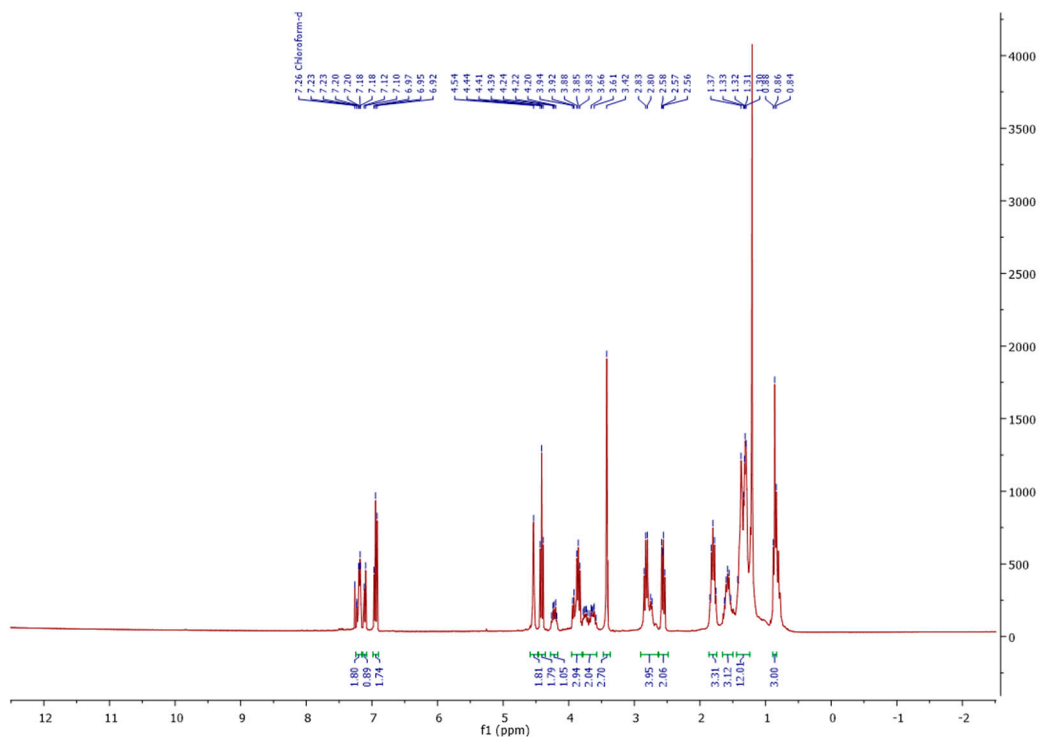

$^{13}\text{C}$  NMR spectrum

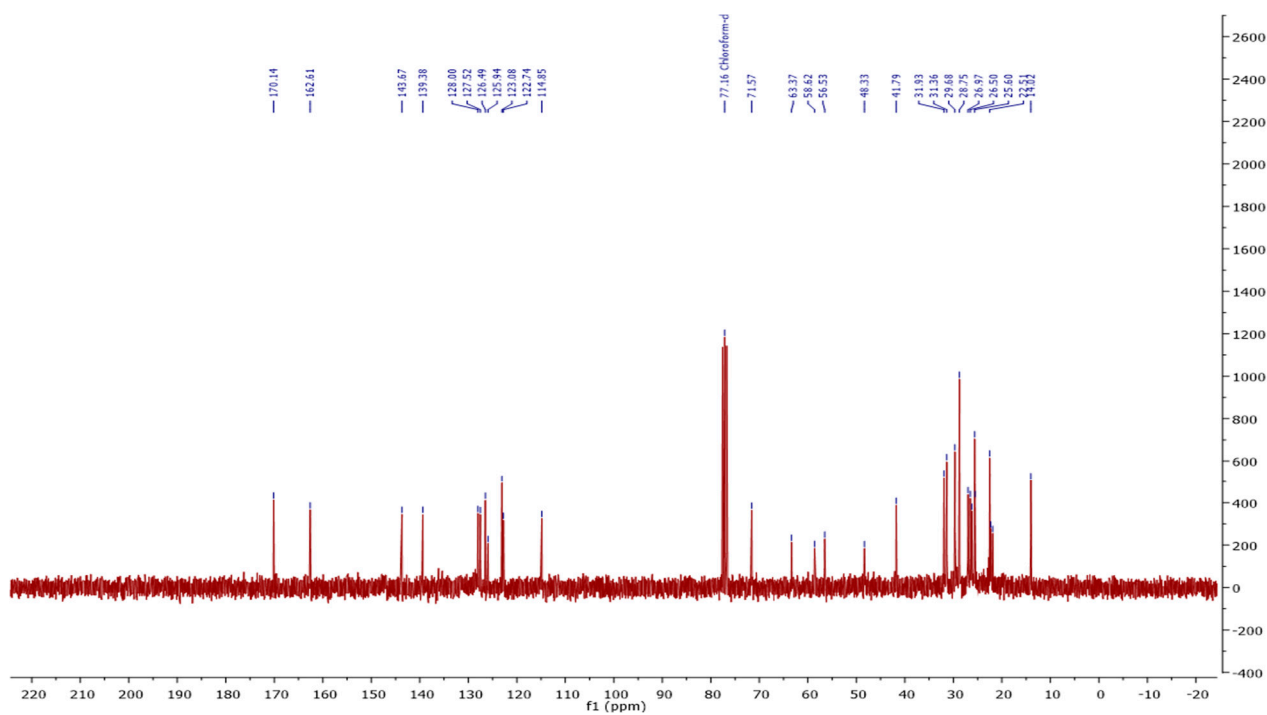

a.i.

ESI positive, 11-C7; < 1 ug/mL (MeOH), B3 mode, 3 Jul 2017  
Resolution (m/z 525) = 33.000, Flow Rate = 120 uL/h

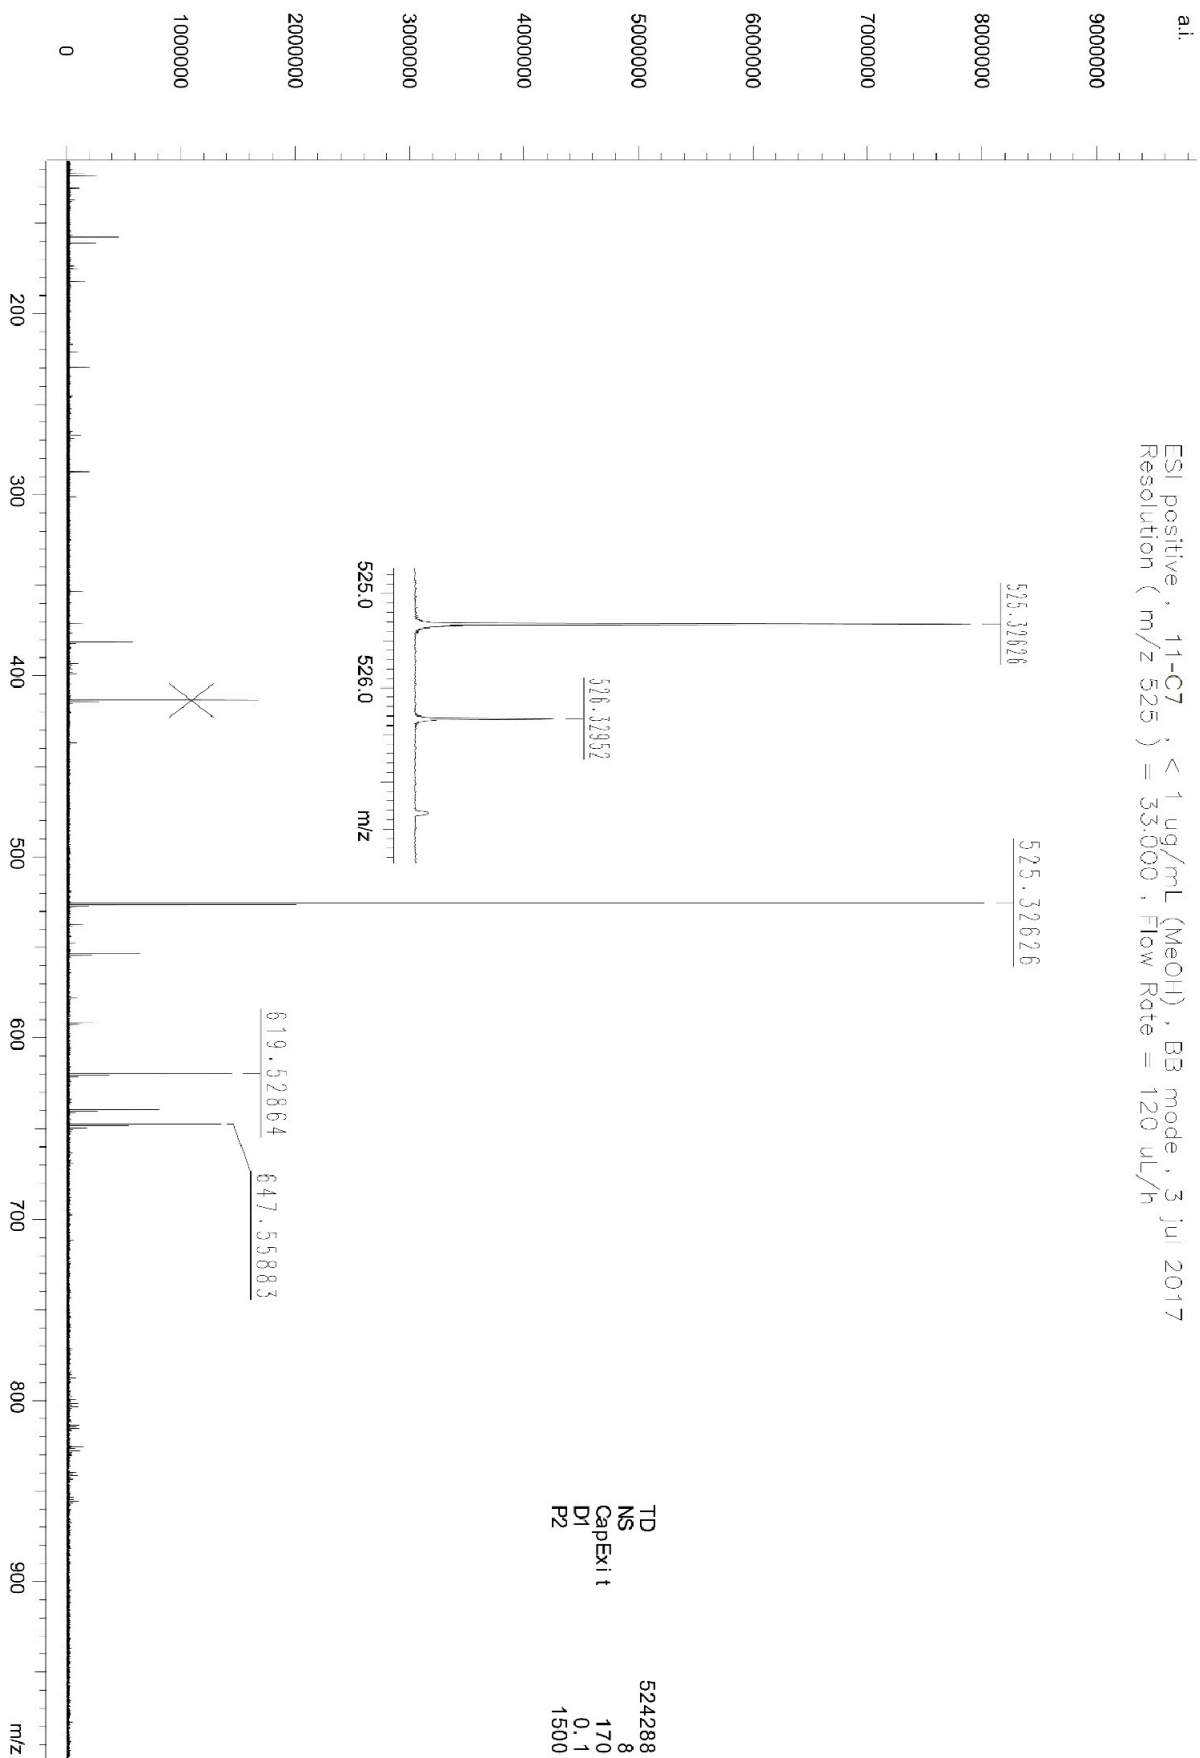

# 13-C9

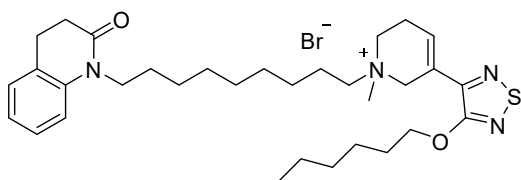

$^1\text{H}$  NMR spectrum

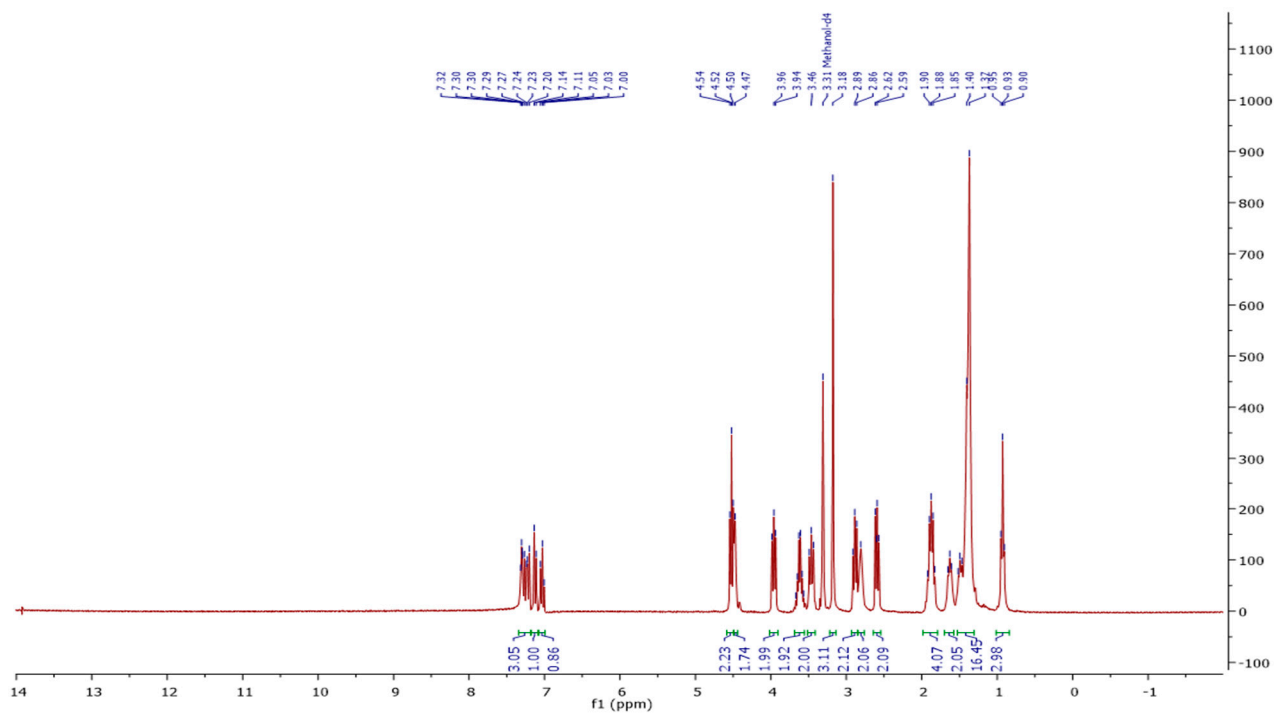

$^{13}\text{C}$  NMR spectrum

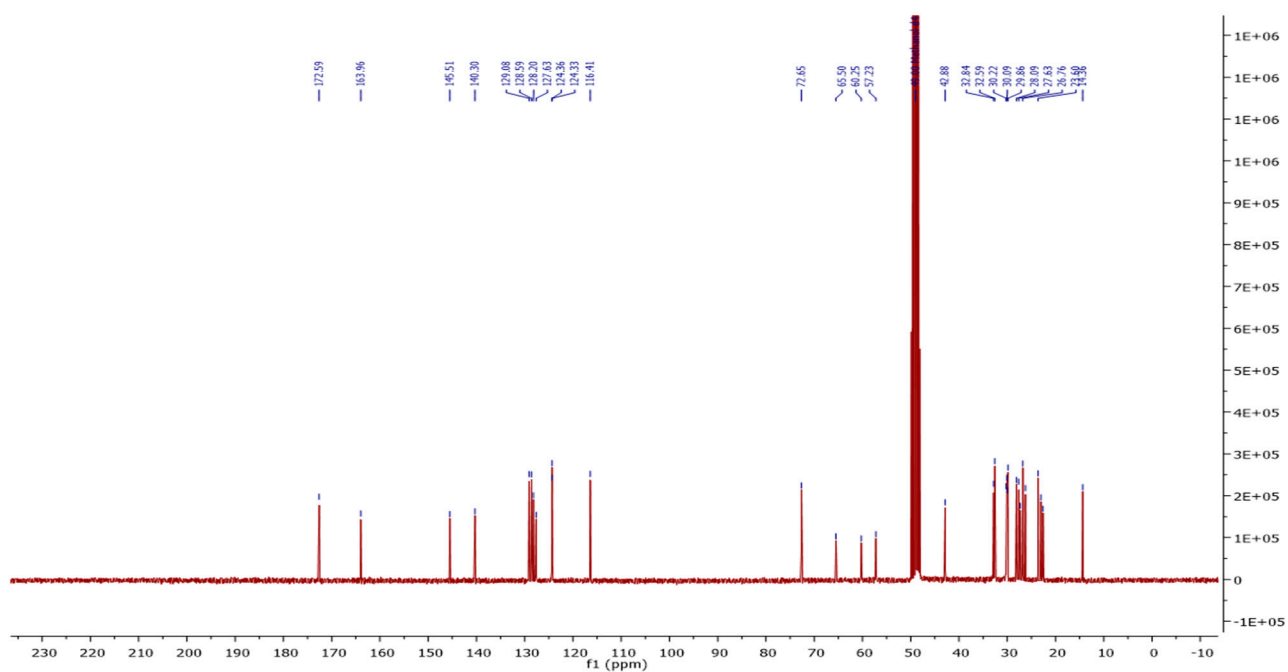

a).

ESI positive, 11-C9, < 1 µg/mL (MeOH), BB mode, 3 Jul 2017  
Resolution (m/z 553) = 31,000, Flow Rate = 120 µL/h

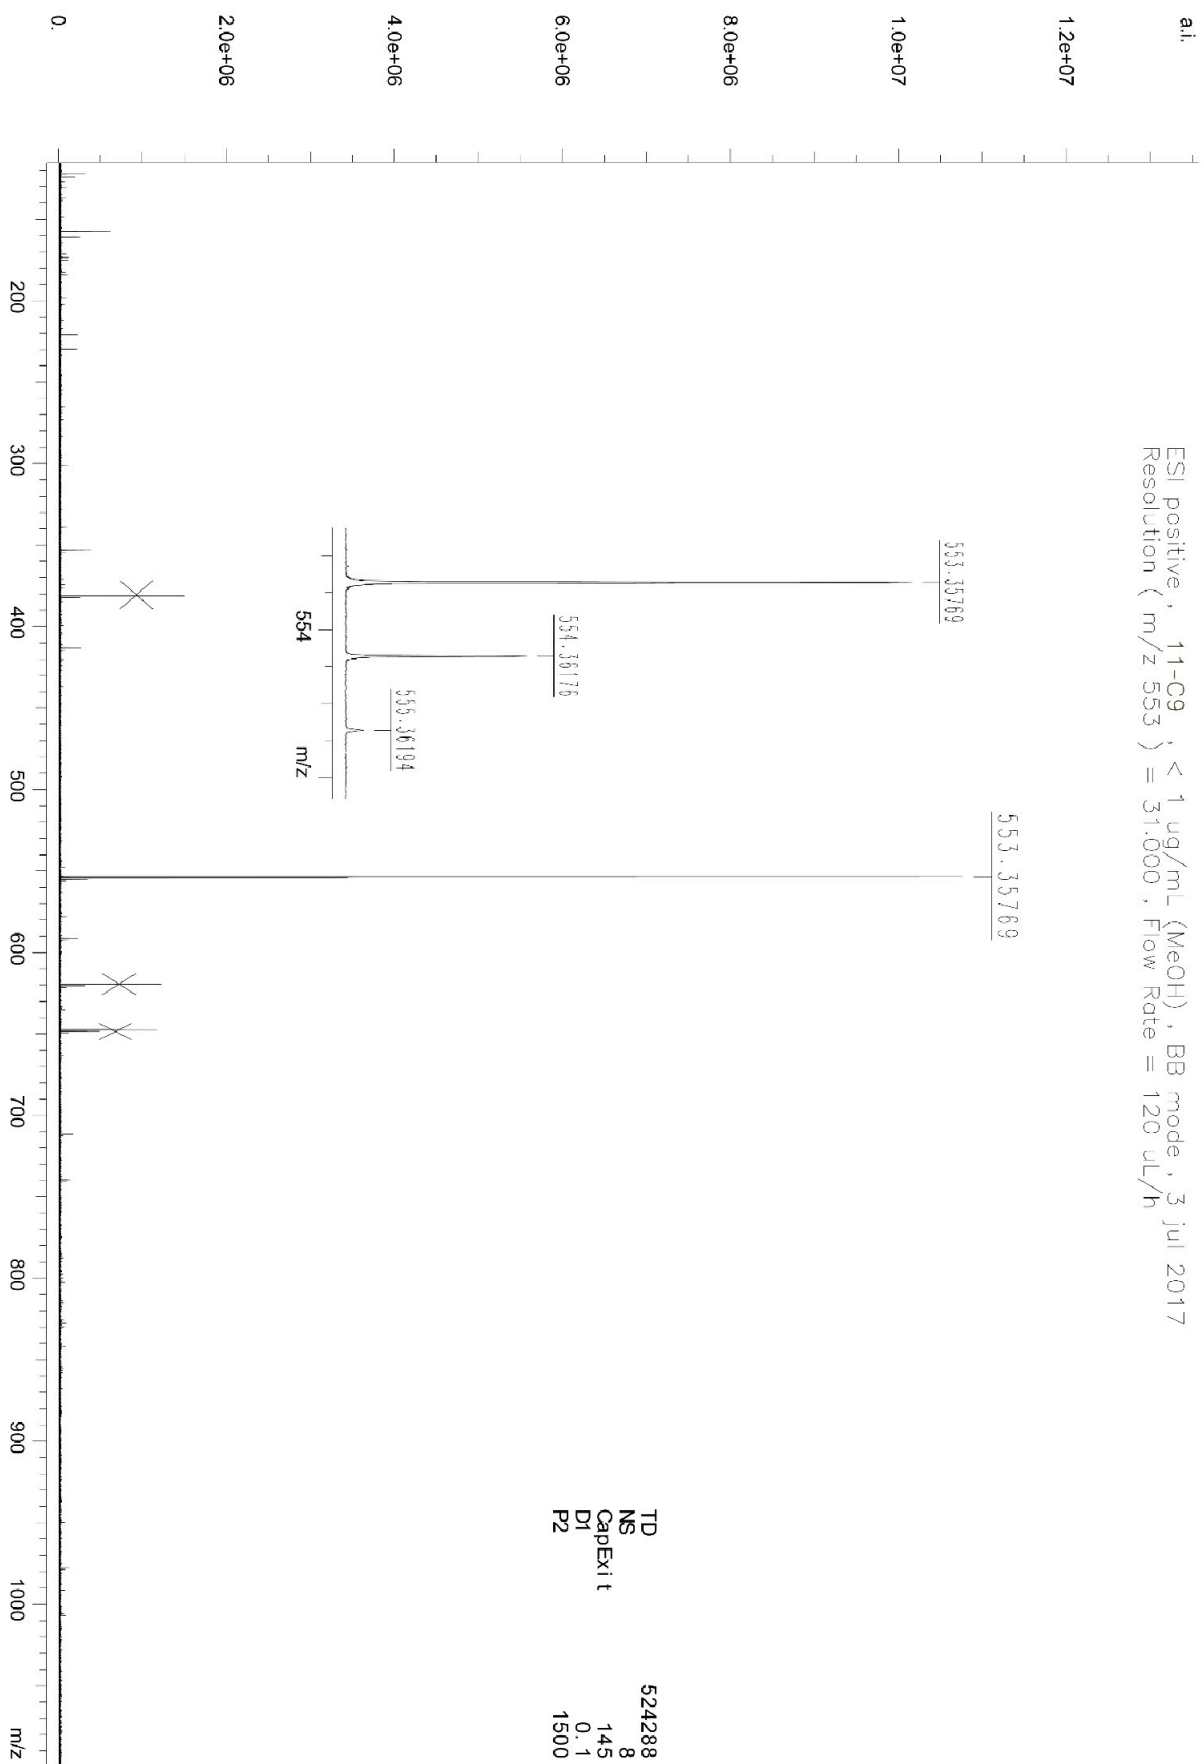

TD 524288  
NS 8  
CapExit 145  
DI 0.1  
P2 1500

## 12-C3

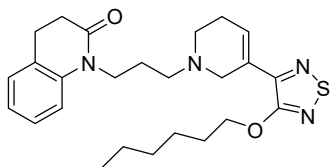

$^1\text{H}$  NMR spectrum

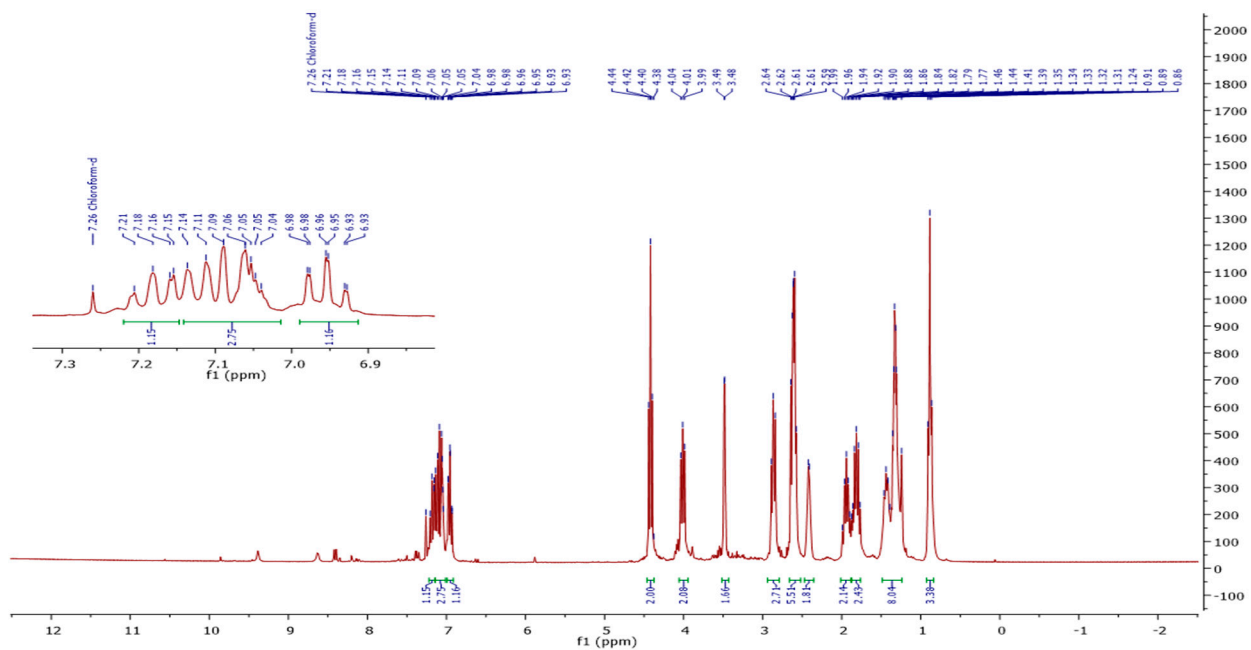

$^{13}\text{C}$  NMR spectrum

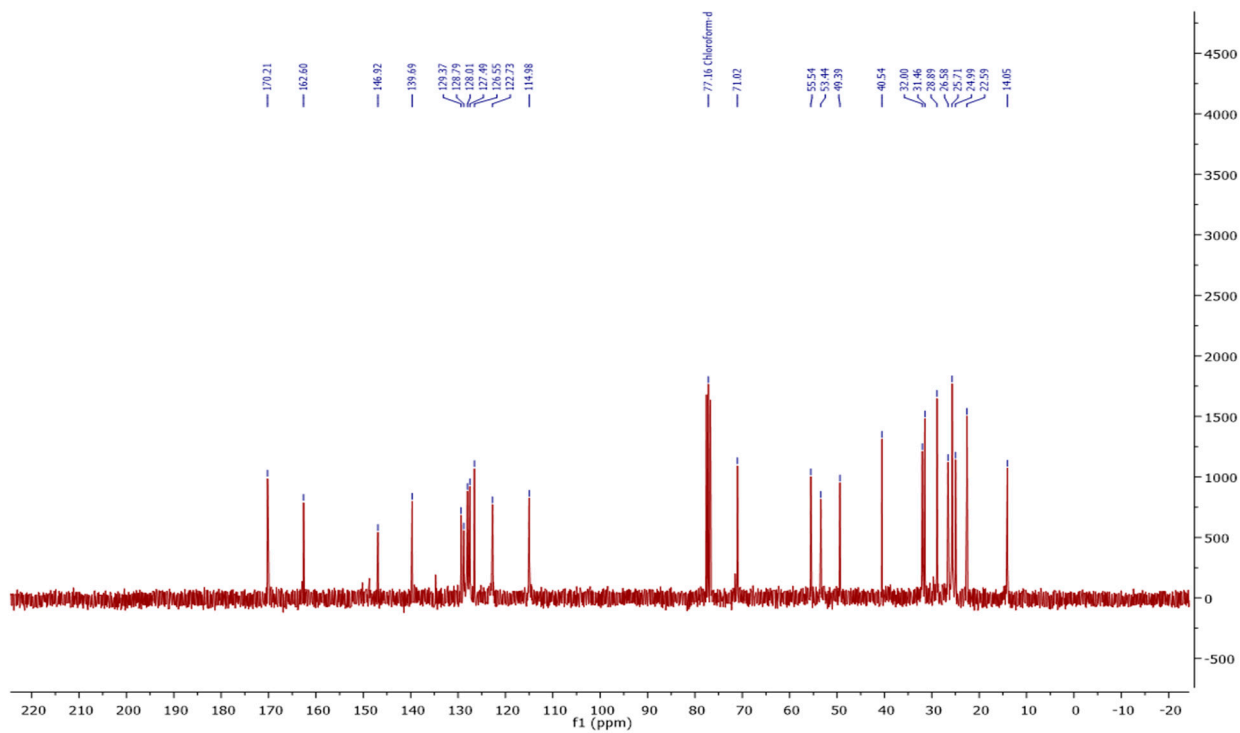

## 12-C3 Oxalate

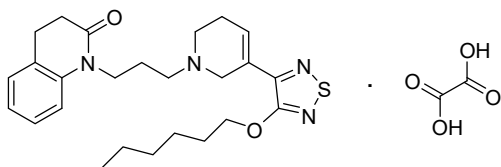

$^1\text{H}$  NMR spectrum

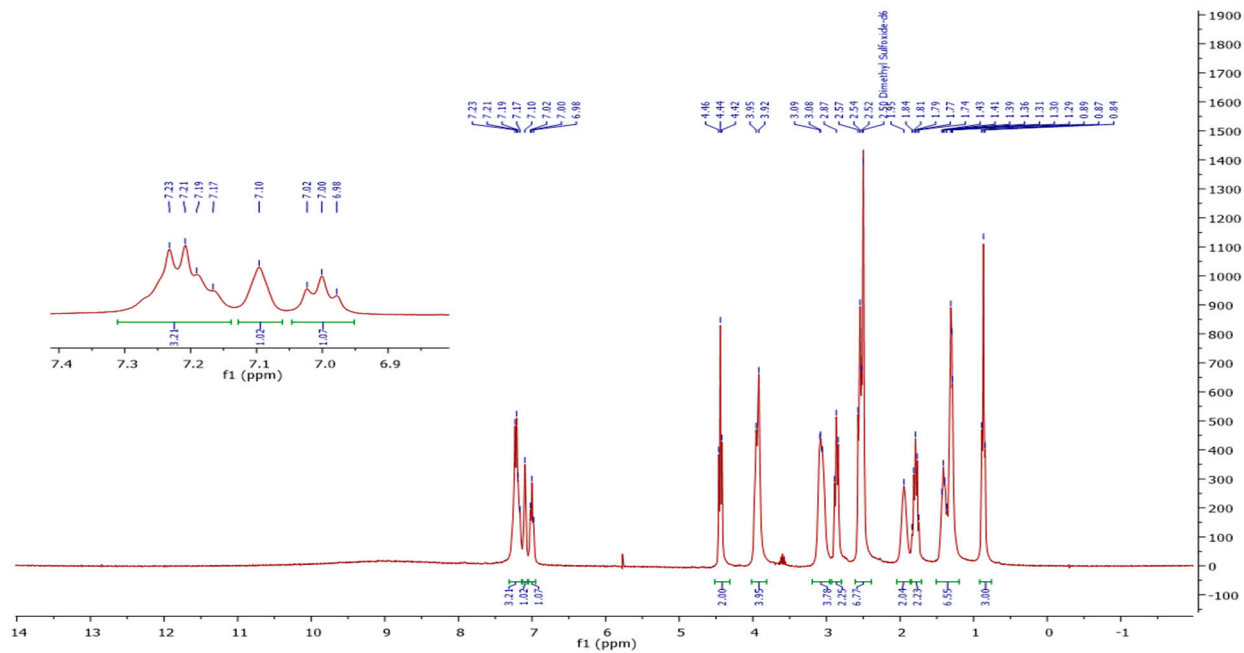

$^{13}\text{C}$  NMR spectrum

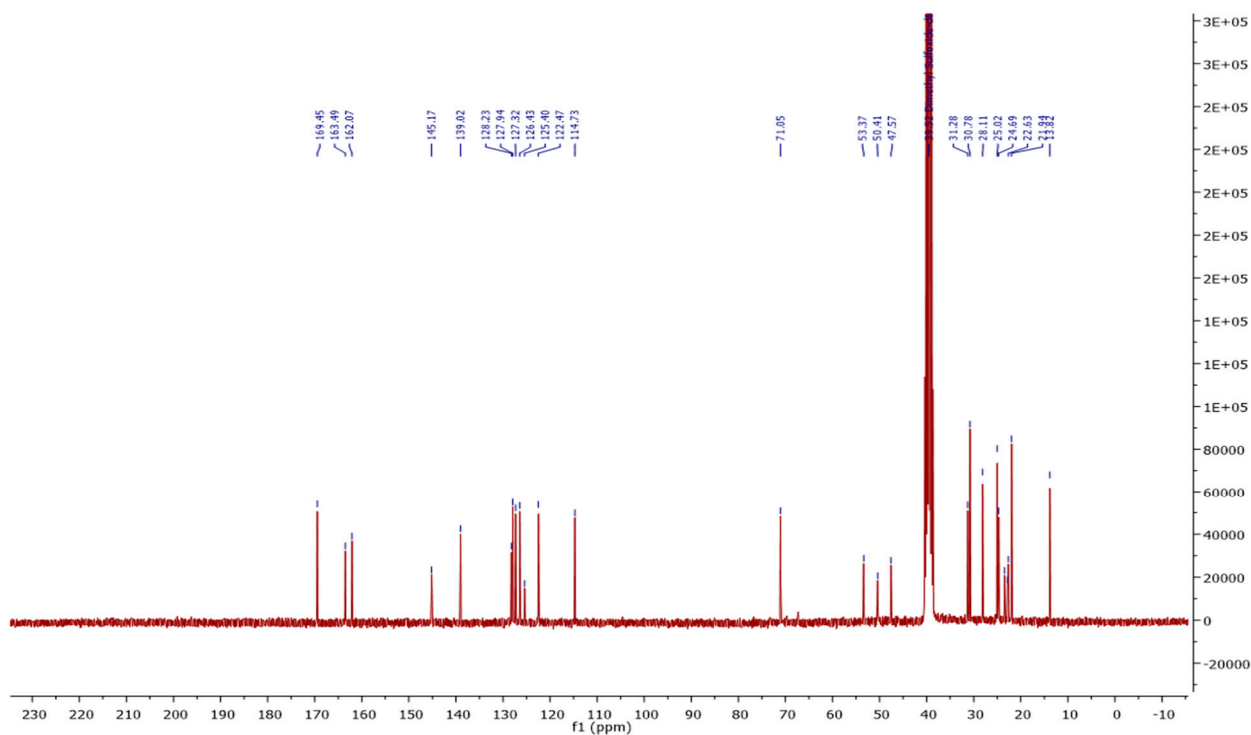

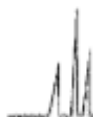**Certificato di Analisi**  
**Certificate of Analysis**

N°Campione/ Sample N°: 2016001294/LAB

Data apertura/ Registration date: 19/02/16

Richiedente/ Requested by:

Committente/ Company:

Dallanocce

UNIVERSITA' DI MILANO-Dip.Scienze  
Farm."Pietro Pratesi"

Campione/ Sample:

Lotto/ Batch:

Q3X

**Analisi - Analysis****Risultati****Specifiche**

Metodo Analitico - Analytical method

Results

Specifications

**CHN**

SOP - MET 019

**Carbonio**

58.23%

**Idrogeno**

6.57%

**Azoto**

9.88%

Note Chiusura/ Notes:

Calculated Elementary analysis for stoichiometry for 1:1

Anal. calcd for C<sub>27</sub>H<sub>36</sub>N<sub>4</sub>O<sub>6</sub>S: C, 59.54; H, 6.66; N, 10.29; found: C, 58,23; H, 6,57; N, 9.88.

a.i. ESI positive, 10-C3, ~ 2 ug/mL (MeOH), B3 mode, 3 jul 2017  
 Resolution (  $m/z$  455 ) – 40.000, Flow Rate – 120  $\mu$ L/h

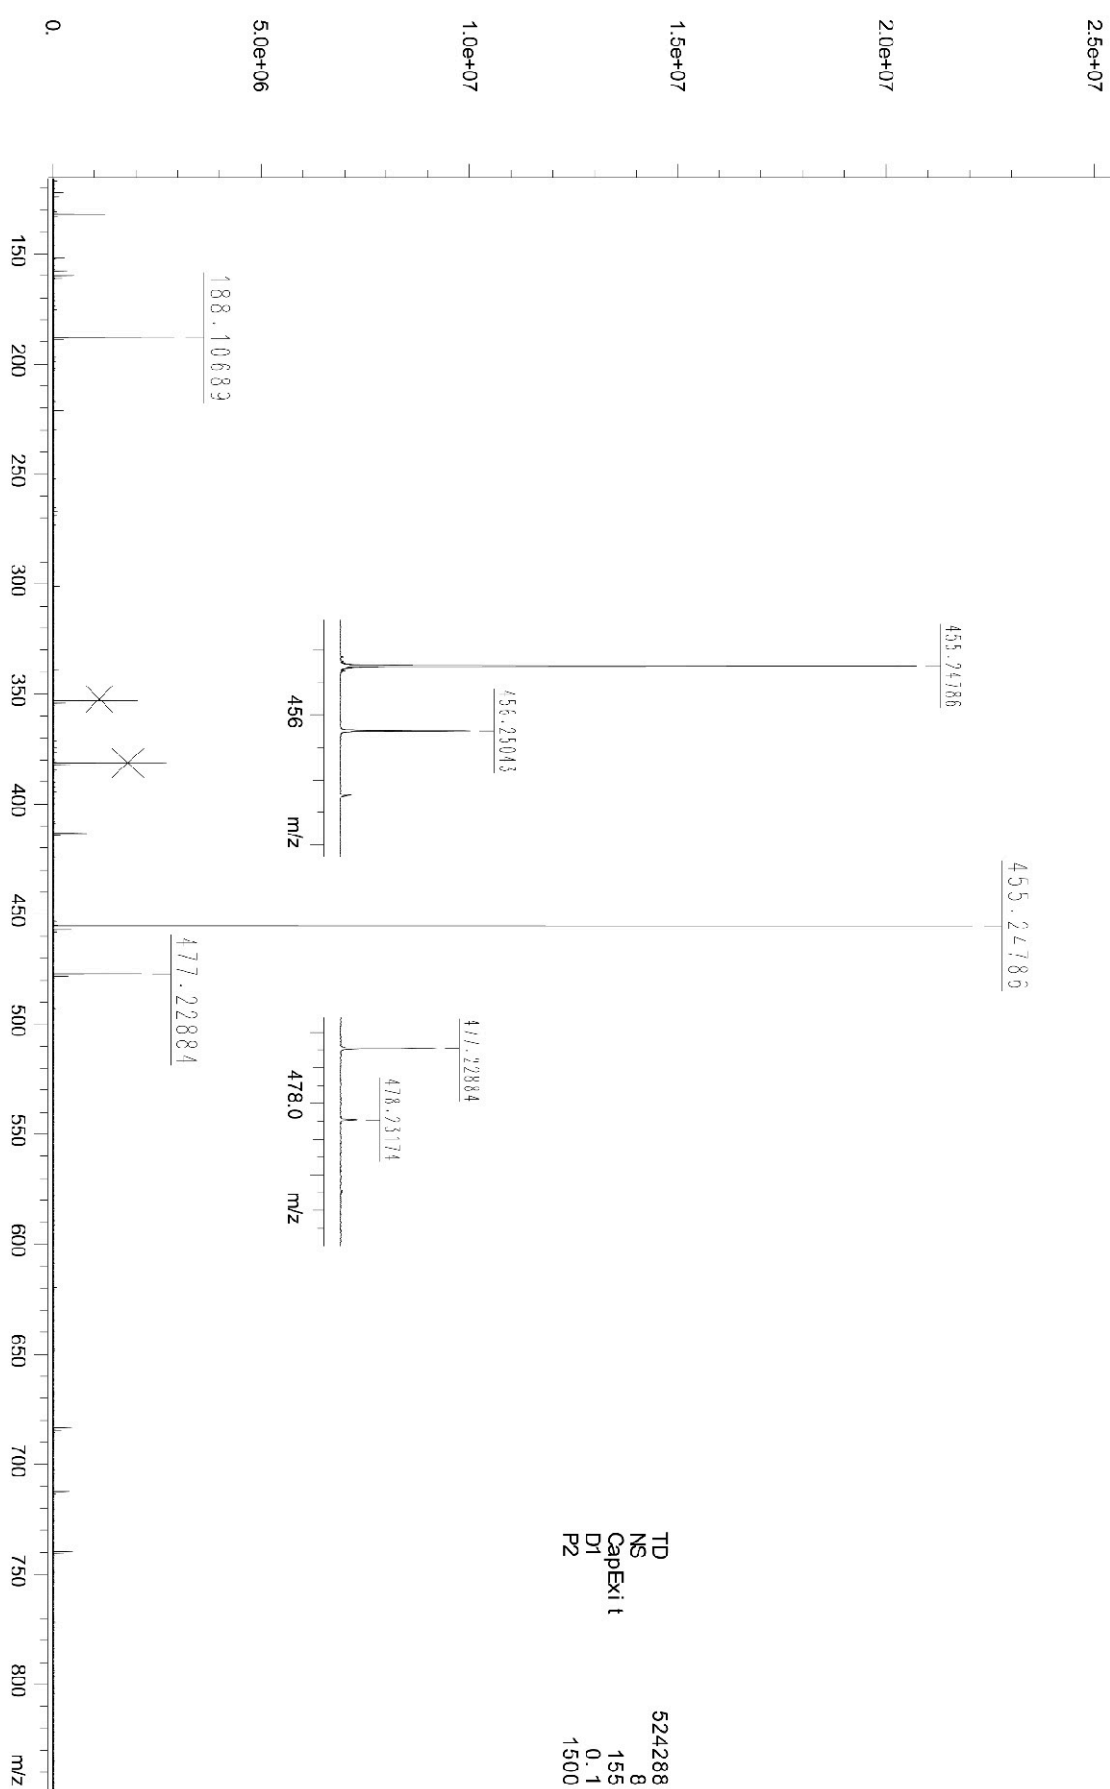

## 12-C5

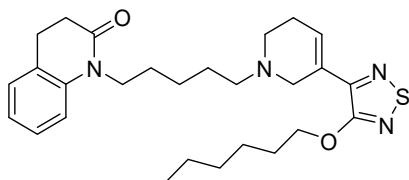

$^1\text{H}$  NMR spectrum

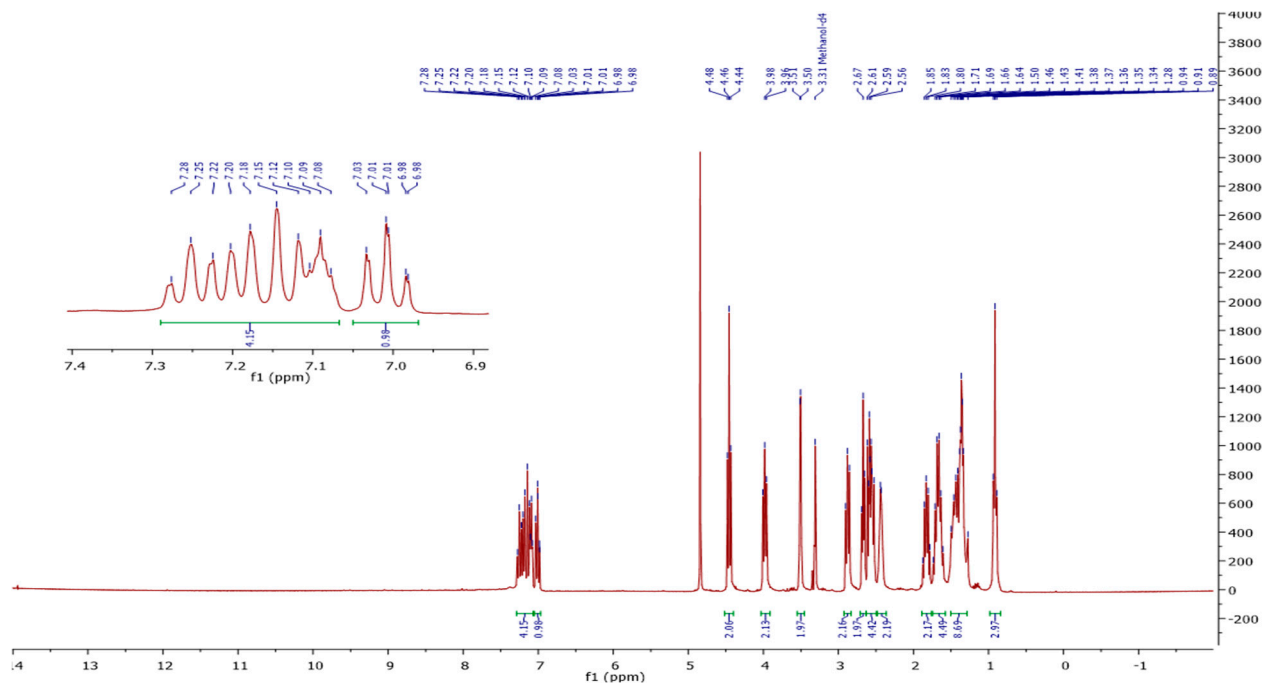

$^{13}\text{C}$  NMR spectrum

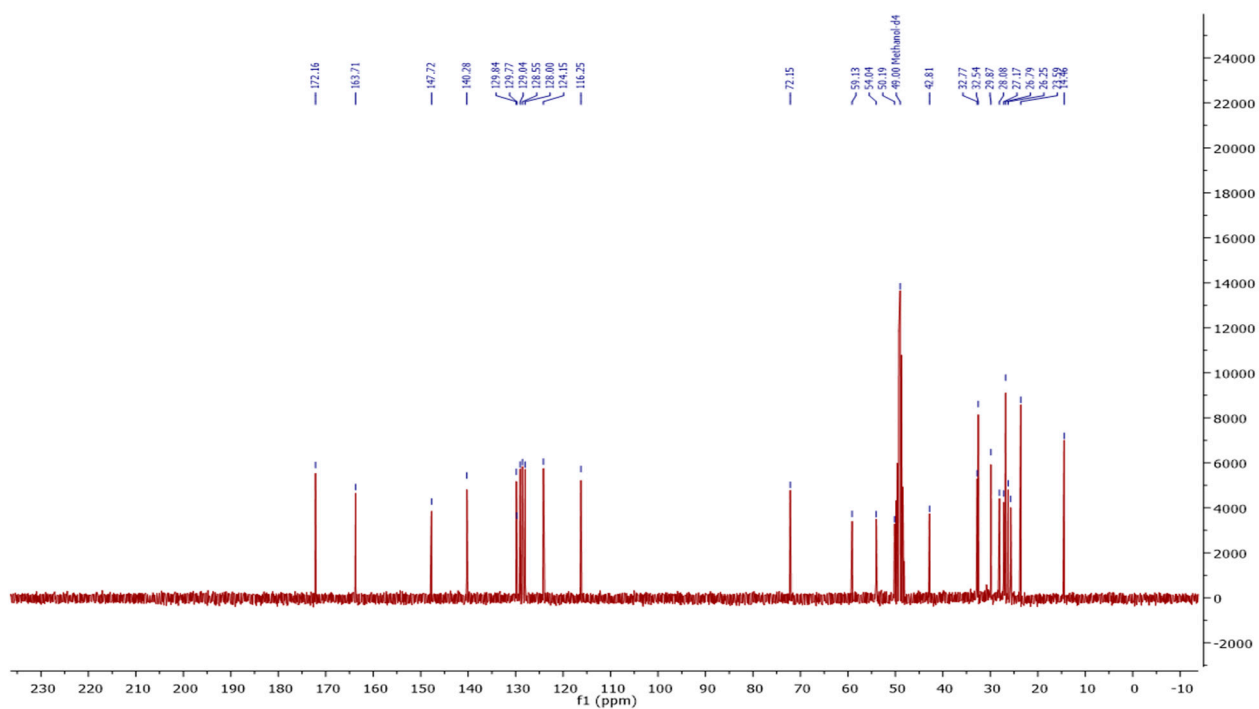

a.i.

ESI positive, 10-C5, < 1 ug/mL (MeOH), BB mode, 3 jul 2017  
Resolution ( m/z 483 ) = 35,000 , Flow Rate = 120 uL/h

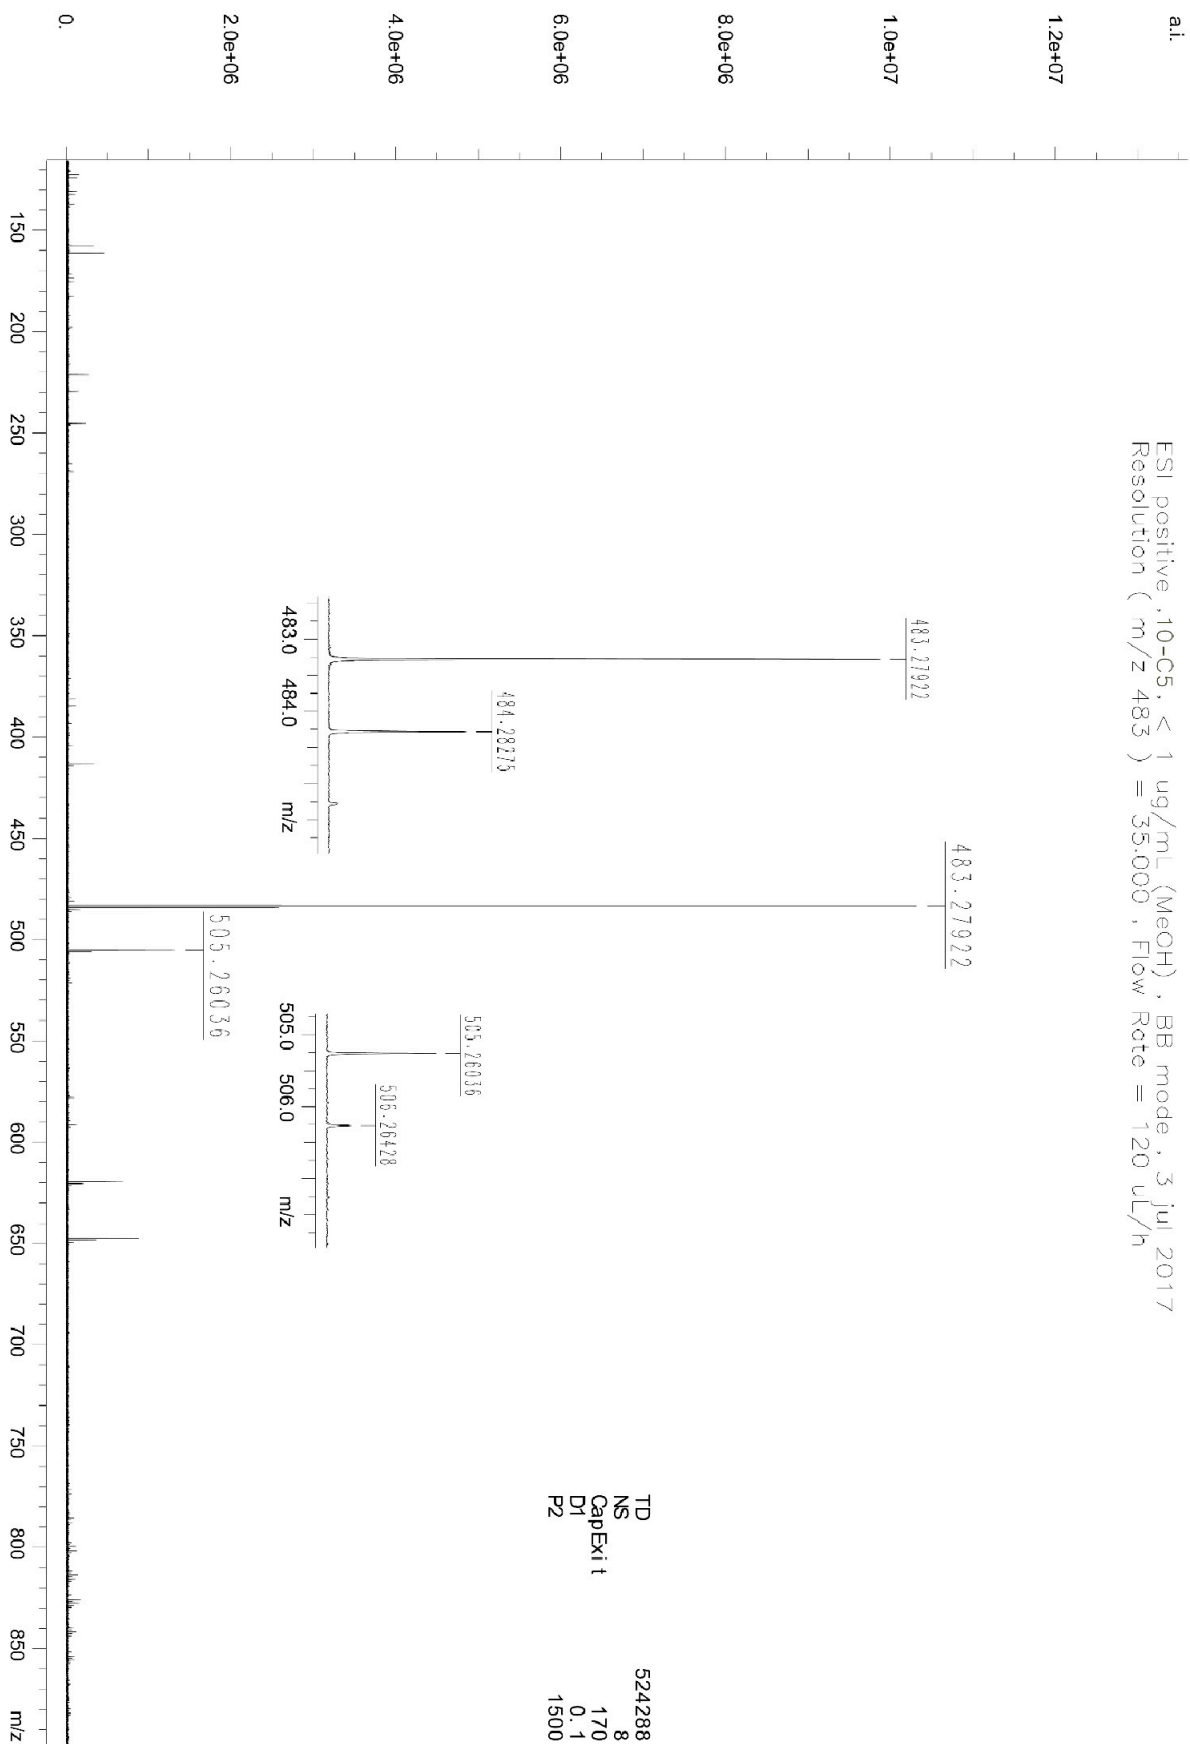

12-C7

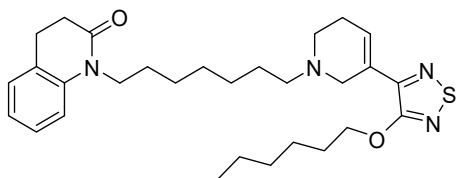

$^1\text{H}$  NMR spectrum

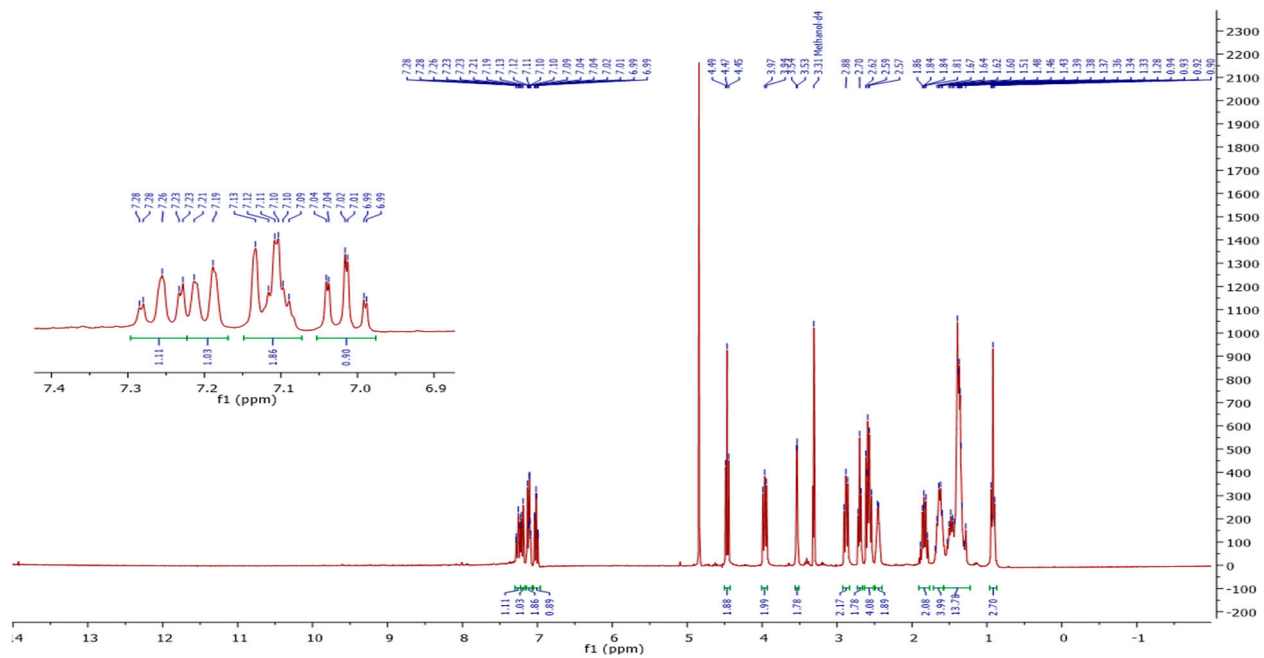

$^{13}\text{C}$  NMR spectrum

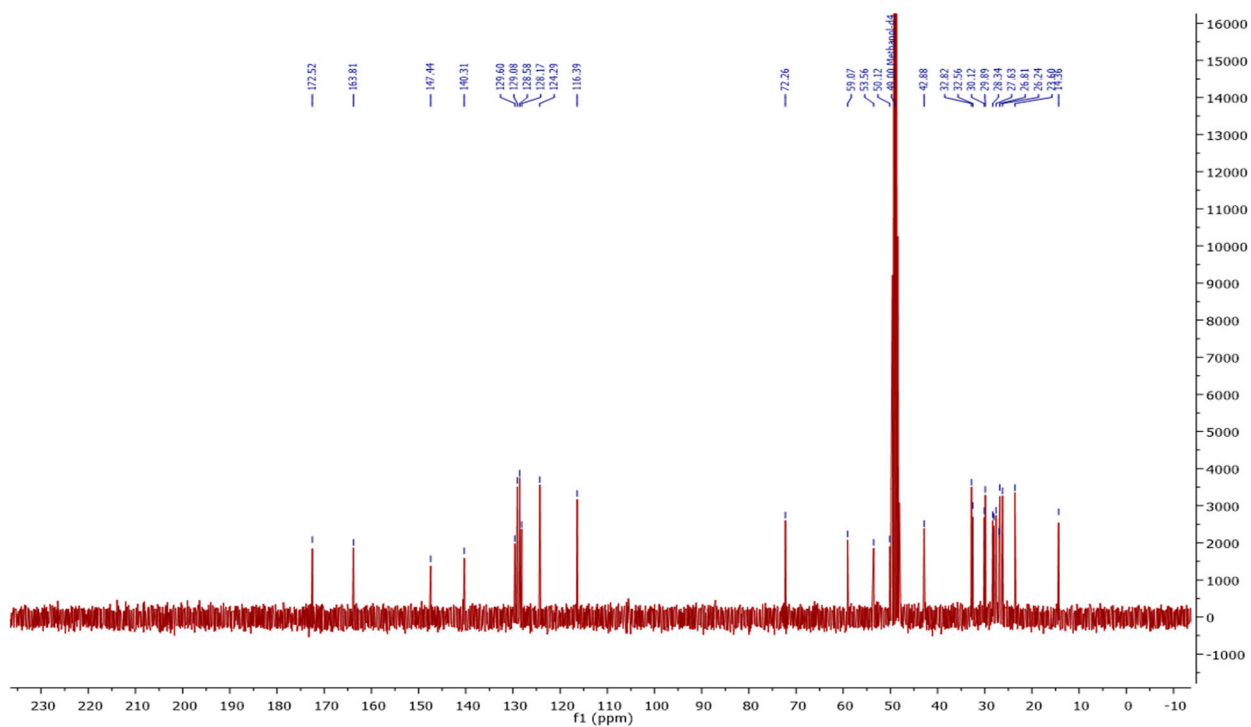

a.i.

ESI positive, 10-C7, < 1 µg/mL (MeOH), BB mode, 3 jul 2017  
Resolution ( m/z 511 ) = 34.000, Flow Rate = 120 µL/h

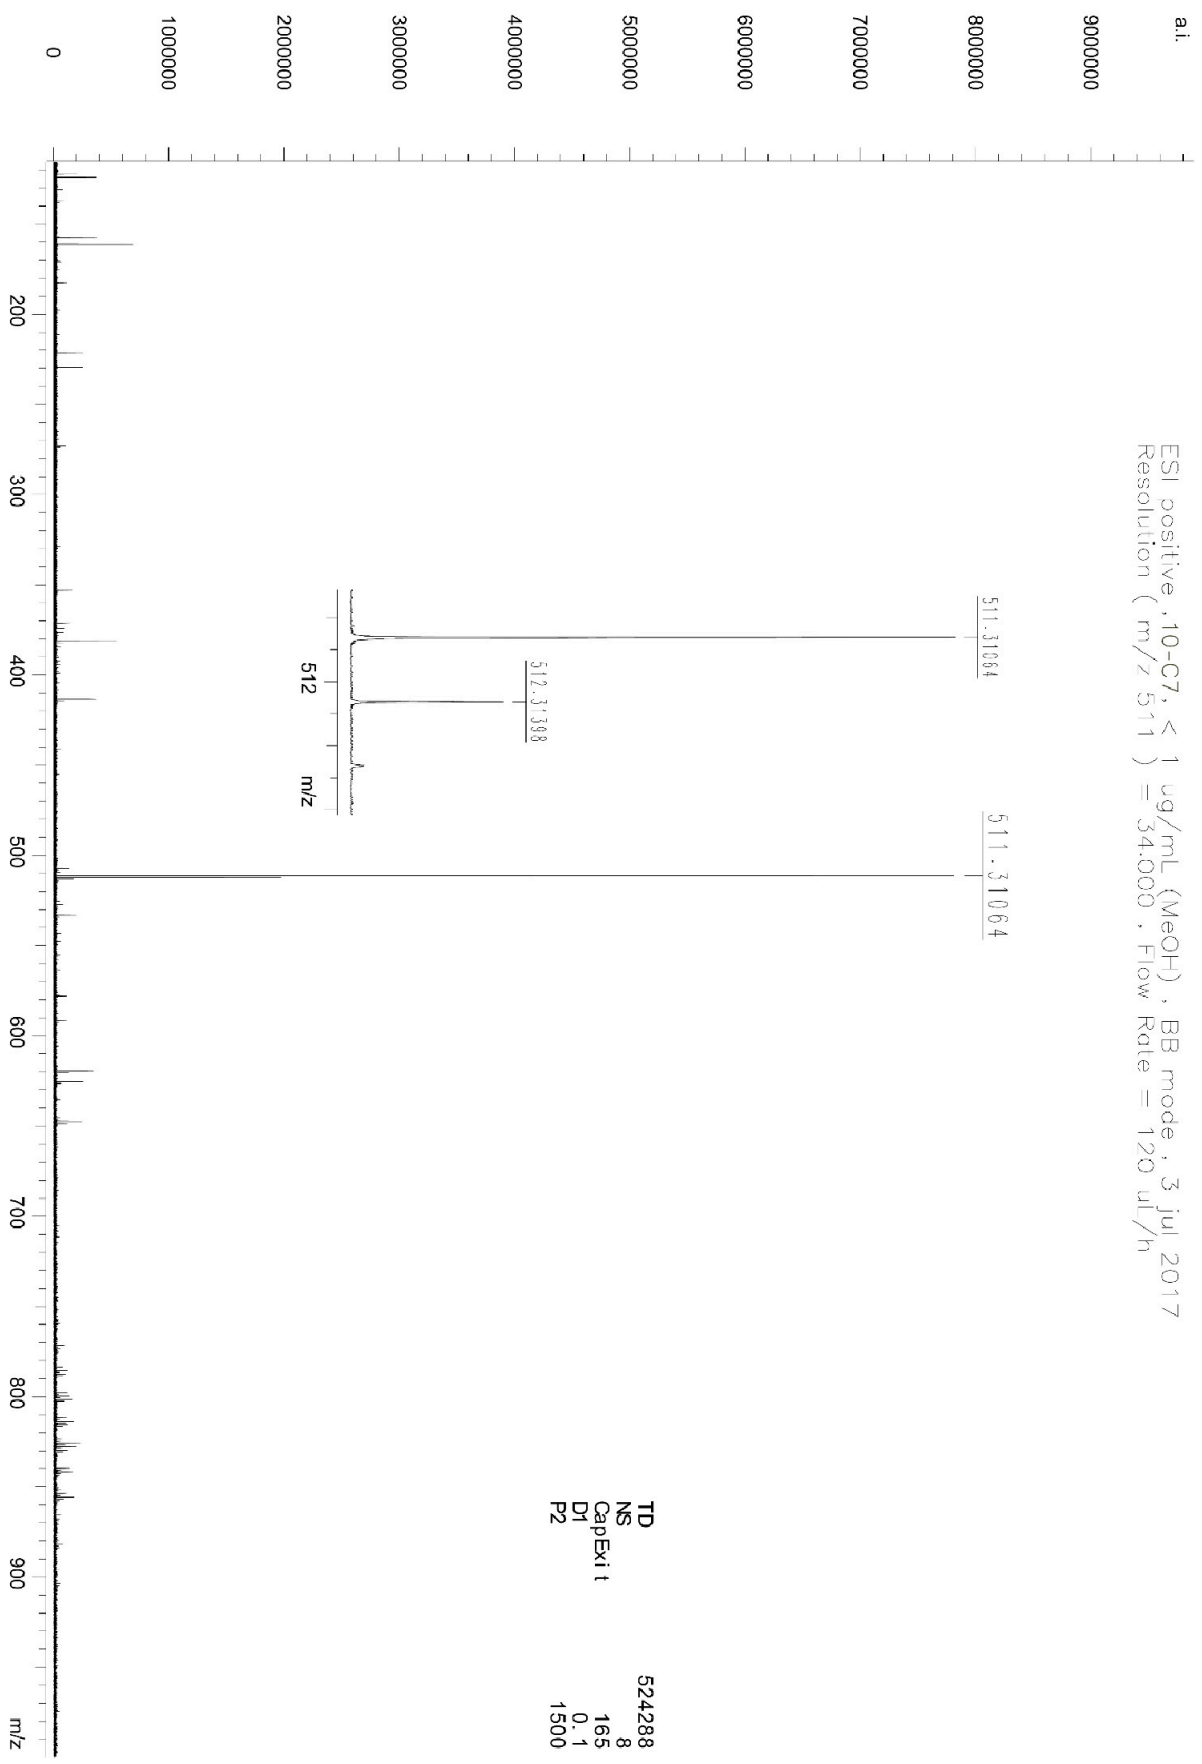

TD 524288  
NS 8  
CapExi t 165  
D1 0.1  
P2 1500

## 12-C9

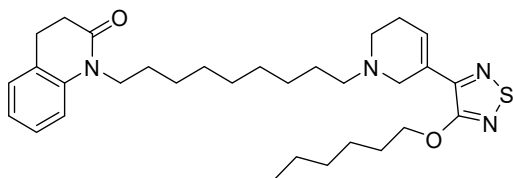

$^1\text{H}$  NMR spectrum

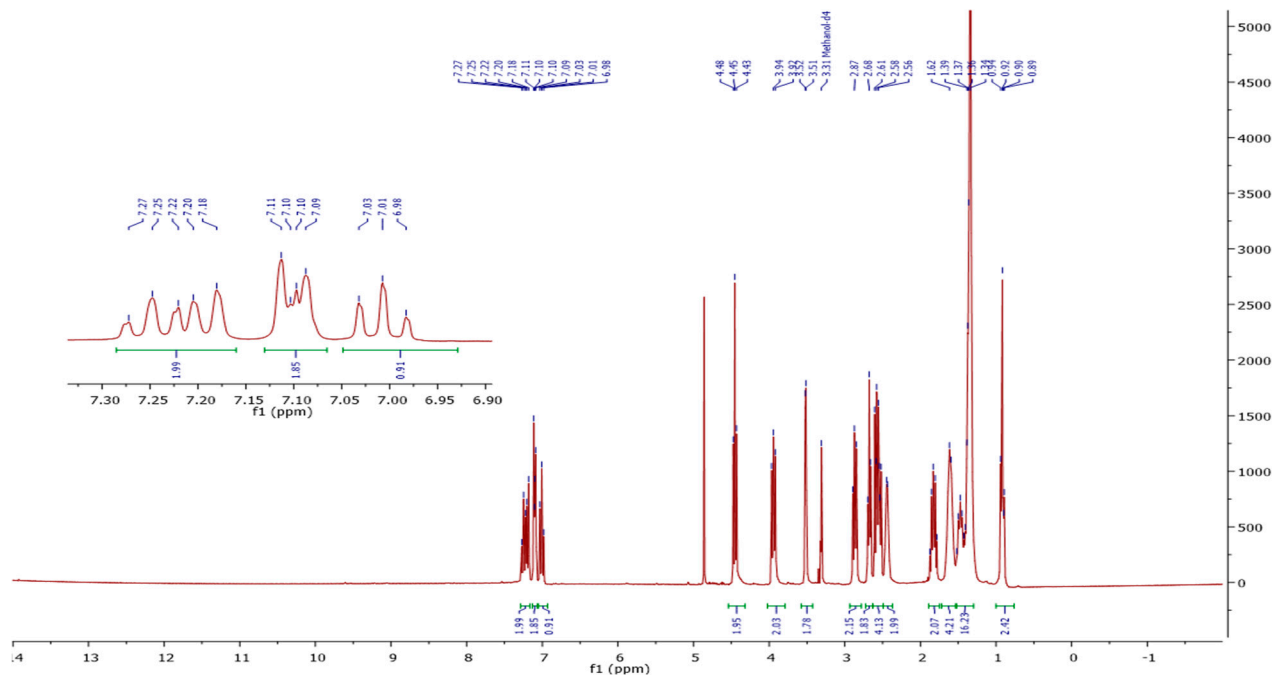

$^{13}\text{C}$  NMR spectrum

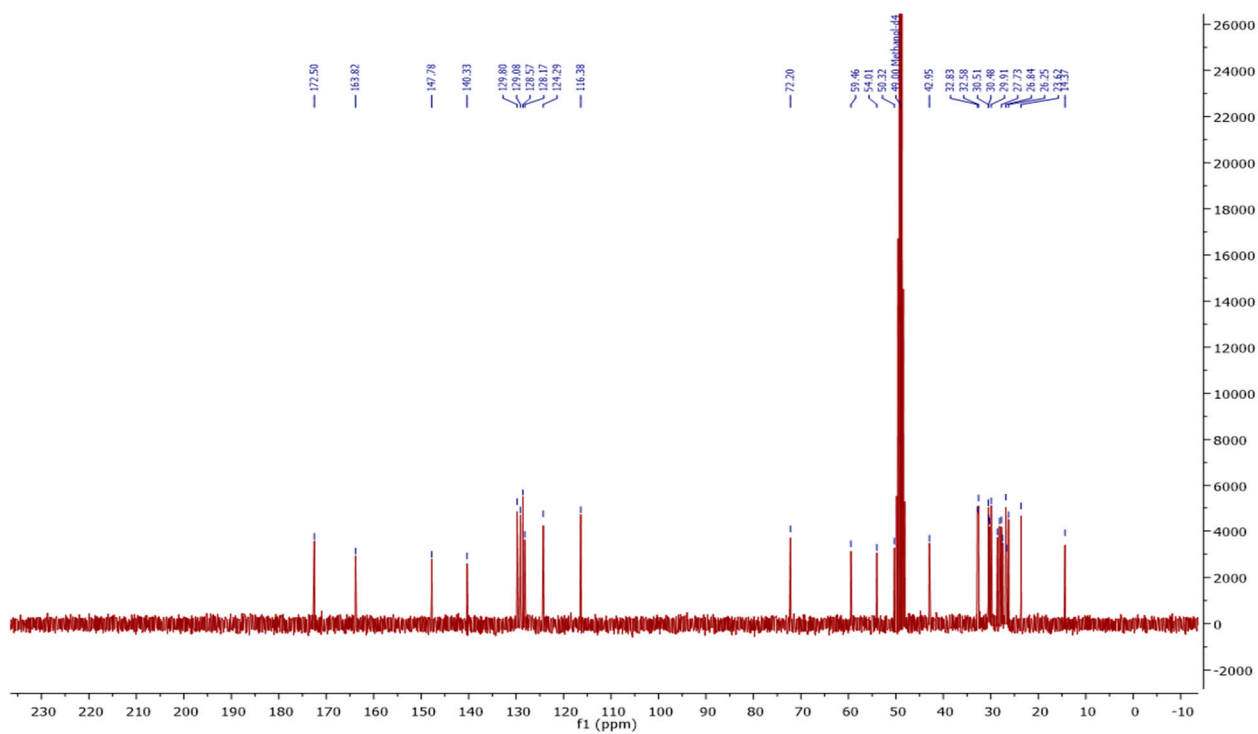

a.i.

ESI positive, 10-C9, < 1 µg/mL (MeOH), BB mode, 3 jul 2017  
Resolution ( m/z 539 ) = 32,000 , Flow Rate = 120 µL/h

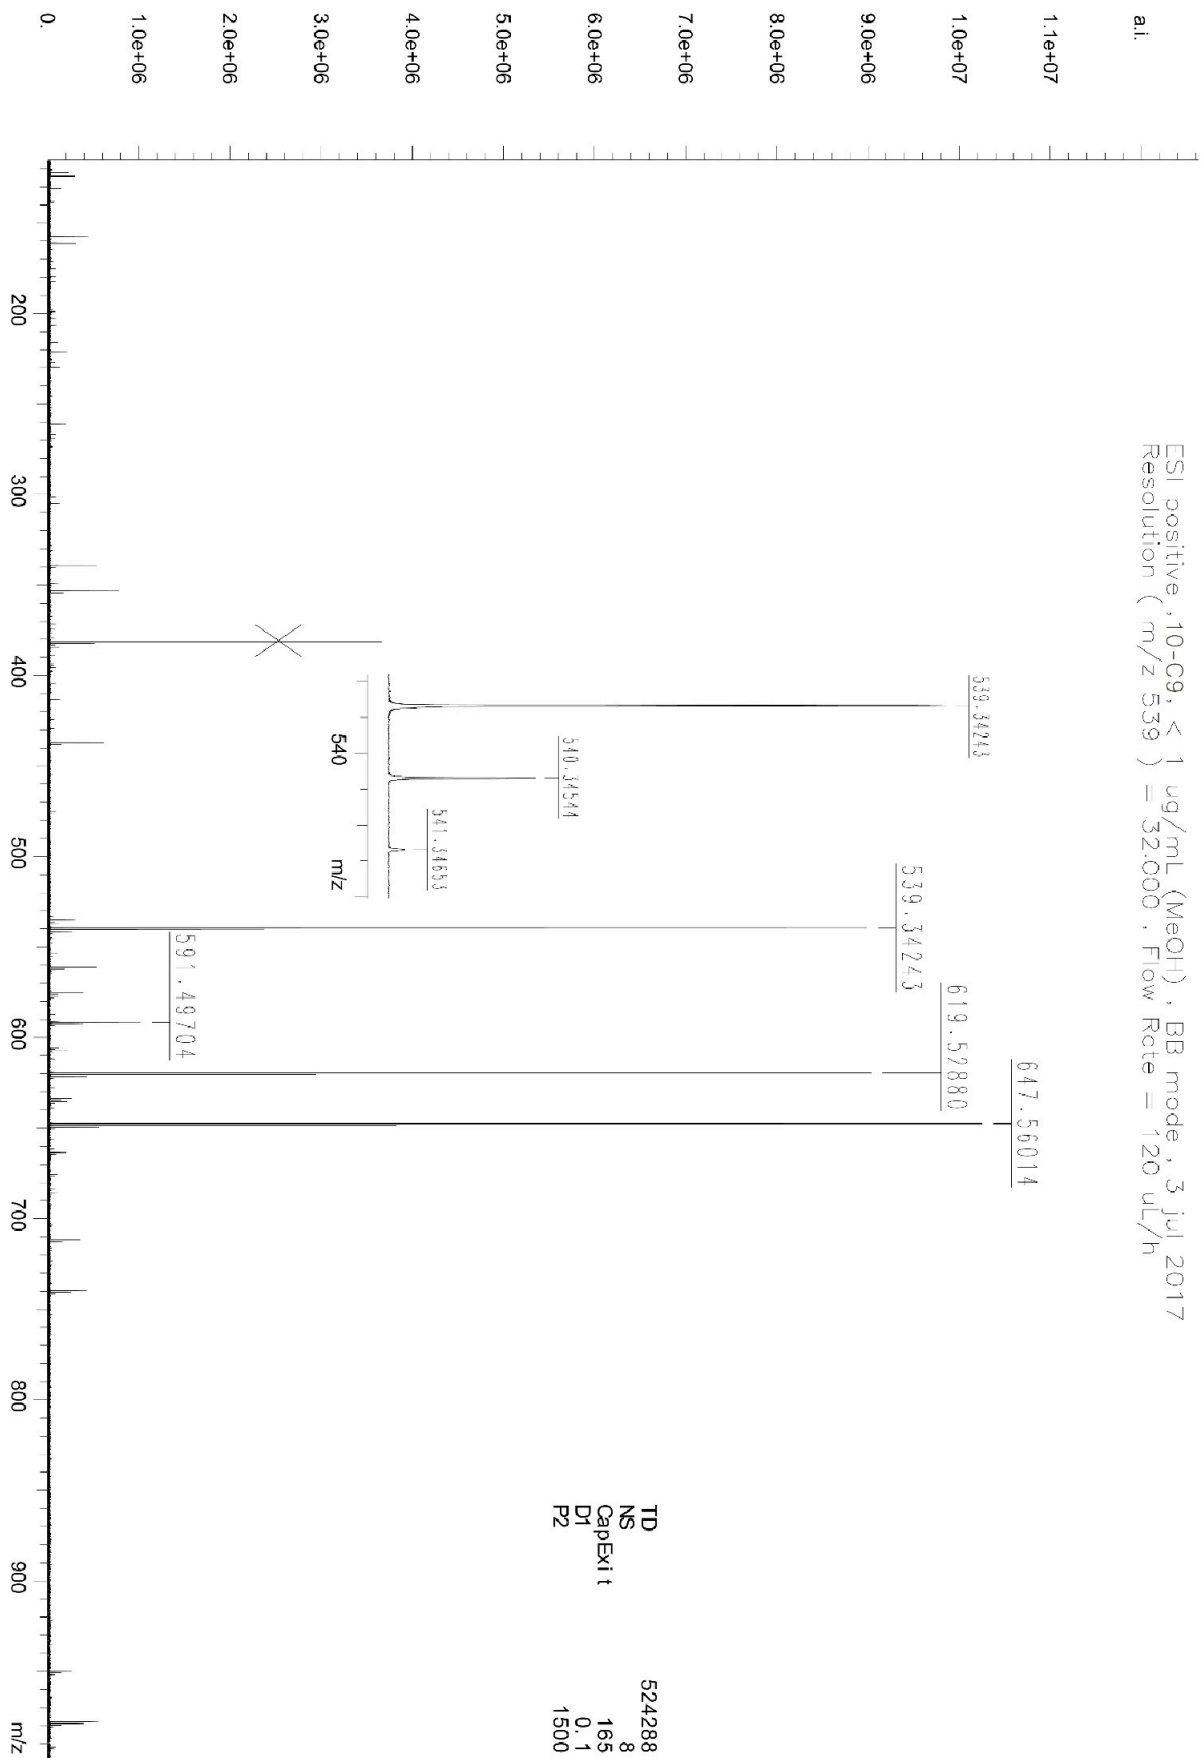

Supplement: s1 [file s1]
